1 **UNC-5 (UNC5) mediates neuronal outgrowth patterning in *Caenorhabditis elegans* by**  
2 **regulating UNC-40 (DCC) asymmetric localization**

3

4 Gerard Limerick<sup>\*</sup>, †, Xia Tang<sup>\*</sup>, †, Won Suk Lee<sup>\*</sup>, †, Ahmed Mohamed<sup>\*</sup>, Aseel Al-Aamiri<sup>\*</sup>, and  
5 William G. Wadsworth<sup>\*</sup>

6

7 <sup>\*</sup>Department of Pathology and Laboratory Medicine, Rutgers Robert Wood Johnson Medical  
8 School, Piscataway, NJ 08854

9

10 †These authors contributed equally to this work

11 running title: neuronal outgrowth patterning

12

13 key words: neuronal development, axon guidance, asymmetric localization, *Caenorhabditis*

14 *elegans*, netrin and wnt signaling

15

16 corresponding author:

17 William G. Wadsworth

18 Department of Pathology and Laboratory Medicine

19 Rutgers Robert Wood Johnson Medical School

20 675 Hoes Lane West

21 Piscataway, NJ 08854-5635

22 732-235-5768

23 [william.wadsworth@rwjms.rutgers.edu](mailto:william.wadsworth@rwjms.rutgers.edu)

24 **Abstract**

25 Neurons extend processes that vary in number, length, and direction of outgrowth.  
26 Extracellular cues help determine outgrowth patterns. In *Caenorhabditis elegans*, neurons  
27 respond to the extracellular UNC-6 (netrin) cue via UNC-40 (DCC) and UNC-5 (UNC5) receptors.  
28 Previously we presented evidence that UNC-40 asymmetric localization at the plasma  
29 membrane is self-organizing and that UNC-40 can localize and mediate outgrowth at randomly  
30 selected sites. We also postulate that the process is statistically dependent, *i.e.* if the probability  
31 of outgrowth at one site changes then the probability at another site(s) must also change. Over  
32 time, the direction of outgrowth activity fluctuates across the membrane. A probability  
33 distribution describes the likelihood of outgrowth in each direction. Random walk modeling  
34 predicts that the degree to which the direction of outgrowth fluctuations affects the outward  
35 displacement of the membrane. We predict that extracellular cues create patterns of outgrowth  
36 by differentially affecting the degree to which the direction of outgrowth activity fluctuates  
37 along the membrane. This produces different rates of outgrowth along the surface and creates  
38 patterns of extension. Here we present evidence that UNC-5 (UNC5) receptor activity regulates  
39 UNC-40 asymmetric localization and the patterning of outgrowth. We show that *unc-5*  
40 mutations alter UNC-40 asymmetric localization and the patterns of outgrowth that neurons  
41 develop. Genetic interactions suggest UNC-5 acts through the UNC-53 (NAV2) cytoplasmic  
42 protein to regulate UNC-40 asymmetric localization in response to both the UNC-6 and EGL-20  
43 (wnt) extracellular cues.

## 44 **Introduction**

45 During development, an intricate network of neuronal connections is established. As processes  
46 extend from the neuronal cell bodies, distinct extension patterns emerge. Some extensions  
47 remain as a single process, whereas others branch and form multiple processes. If they branch,  
48 the extensions can travel in the same or in different directions. Extensions vary in length.  
49 Extracellular cues are known to influence this patterning, but the underlying logic that governs  
50 the formation of patterns remains a mystery.

51

52 The secreted extracellular UNC-6 (netrin) molecule and its receptors, UNC-5 (UNC5) and UNC-40  
53 (DCC) are highly conserved in invertebrates and vertebrates, and are known to play key roles in cell  
54 and axon migrations. In *Caenorhabditis elegans*, UNC-6 is produced by ventral cells in the midbody  
55 and by glia cells at the nerve ring in the head (WADSWORTH *et al.* 1996; WADSWORTH AND  
56 HEDGECOCK 1996; ASAKURA *et al.* 2007). It's been observed that neurons that express the receptor  
57 UNC-40 (DCC) extend axons ventrally, towards the UNC-6 sources; whereas neurons that express  
58 the receptor UNC-5 (UNC5) alone or in combination with UNC-40 extend axons dorsally, away from  
59 the UNC-6 sources (HEDGECOCK *et al.* 1990; LEUNG-HAGESTEIJN *et al.* 1992; CHAN *et al.* 1996;  
60 WADSWORTH *et al.* 1996).

61

62 It is commonly proposed that axons are guided by attractive and repulsive mechanisms (Tessier-  
63 Lavigne and Goodman 1996). According to this model, an extracellular cue acts as an attractant or  
64 repellent to direct neuronal outgrowth towards or away from the source of a cue. UNC-5 (UNC5)  
65 has been described as a “repulsive” netrin receptor because it mediates guidance away from netrin  
66 sources (Leung-Hagesteijn *et al.* 1992; Hong *et al.* 1999; Keleman and Dickson 2001; Moore *et*  
67 *al.* 2007). The attraction and repulsion model is deterministic. That is, given the same

68 conditions, the response of the neuron, attractive or repulsive, will always be the same. This  
69 idea forms the bases of the analysis and interpretation of experimental results. Axonal growth  
70 cone movement towards or away from the source of a cue is considered to be mediated by  
71 attractive or repulsive responses to the cue. In genetic studies, a mutation that disrupts  
72 movement towards the cue source denotes gene function within an attractive pathway,  
73 whereas mutations that disrupt movement away from a source denotes gene function within a  
74 repulsive pathway. If an axonal growth cone is observed to move towards and then away from  
75 the source of a cue, the responsiveness of a neuron is thought to switch from attractive to  
76 repulsive. However, it is important to note that attraction or repulsion is not an intrinsic  
77 property of the interaction between the receptor and ligand. In fact, the interaction only  
78 promotes or inhibits outward movement of the membrane. Attraction and repulsion refers to  
79 a direction, which is an extrinsic property of the cellular response that varies depending on the  
80 physical positions of the ligands. Movement towards or away from a cue source is caused by  
81 attractive and repulsive *effects*, such as chemoattraction and chemorepulsion, which is  
82 movement that is directed by chemical gradients of ligands. We argue that classifying gene  
83 function as attractive or repulsive is problematic since attraction and repulsion are not intrinsic  
84 properties of cellular mechanisms.

85

86 We have proposed an alternative model in which the movement of neuronal outgrowth is not  
87 considered in terms of attraction and repulsion. This model comprises three concepts. The  
88 first concept is that receptors along the surface of the membrane change position. This is  
89 important since the spatial distribution of receptors can influence the movement that a neuron  
90 has in response to the extracellular ligands (NGUYEN *et al.* 2014; NGUYEN *et al.* 2015). We  
91 hypothesize that the spatial distribution of UNC-40 can influence the manner though which  
92 force is applied to the membrane and thereby affect the outward movement of the membrane.

93 It's known that the surface localization of the UNC-40 receptor undergoes dramatic changes  
94 during the development of the HSN axon (ADLER *et al.* 2006; XU *et al.* 2009; KULKARNI *et al.*  
95 2013). As HSN axon formation begins, UNC-40 becomes asymmetrically localized to the ventral  
96 surface of the cell body, which is nearest the ventral sources of the secreted UNC-6 ligand. Live  
97 imaging of the developing leading edge reveals a dynamic pattern of UNC-40 localization with  
98 areas of concentrated UNC-40 localization shifting positions along the surface (KULKARNI *et al.*  
99 2013). Dynamic UNC-40::GFP localization patterns have also been reported during anchor cell  
100 extension (WANG *et al.* 2014). Similar to axon extension, the anchor cell also sends an extension  
101 through the extracellular matrix and this extension is also regulated by UNC-40 and UNC-6  
102 (ZIEL *et al.* 2009; HAGEDORN *et al.* 2013). Live imaging of the anchor cell reveals that UNC-  
103 40::GFP "clusters" form, disassemble, and reform along the anchor cell's plasma membrane  
104 (WANG *et al.* 2014).

105

106 The second concept is that the asymmetric localization of the receptor, and the subsequent  
107 outgrowth activity it mediates, is stochastically oriented. It was observed that UNC-40 can  
108 asymmetrically localize to a randomly selected surface if the UNC-6 ligand is not present to  
109 provide a pre-established asymmetric cue (XU *et al.* 2009). We noted that the self-organizing  
110 nature of UNC-40 localization is reminiscent of a self-organizing process observed in single-cell  
111 yeast, *Dictyostelium discoideum*, and neutrophils, where cell movement will occur in a random  
112 direction if the chemotactic cue is absent or is uniformly presented (FRASER *et al.* 2000;  
113 ARRIEMERLOU AND MEYER 2005; MORTIMER *et al.* 2008). The process through which outgrowth  
114 activity becomes asymmetrically organized is thought to utilize positive- and negative-feedback  
115 loops (BOURNE AND WEINER 2002; GRAZIANO AND WEINER 2014). Such loops might also drive the  
116 asymmetric localization of UNC-40 (XU *et al.* 2009; WANG *et al.* 2014). Positive and negative  
117 feedback are considered complementary mechanisms; positive feedback amplifies the

118 polarized response to an extracellular cue, while negative feedback limits the response and can  
119 confine the positive feedback to the leading edge (BOURNE AND WEINER 2002). The biological  
120 nature of feedback loops controlling UNC-40 activity is unclear. However, they may involve the  
121 differential transport of receptors and effectors to the plasma membrane surface. Imaging  
122 experiments of cells in culture suggest that netrin-1 (UNC-6) regulates the distribution of DCC  
123 (UNC-40) and UNC5B (UNC-5) at the plasma membrane (GOPAL *et al.* 2016). In these studies,  
124 netrin-1 (UNC-6) was shown to stimulate translocation of DCC (UNC-40) and UNC5B (UNC-5)  
125 receptors from intracellular vesicles to the plasma membrane and, further, the transported receptors  
126 were shown to localize at the plasma membrane (GOPAL *et al.* 2016).

127

128 We argue that the process that localizes UNC-40 to a site on the plasma membrane possesses  
129 inherent randomness (Figure 1). Evidence suggests that the conformation of the UNC-40  
130 molecule controls whether the process will cause UNC-40 localization to the site of UNC-6  
131 interaction or to another site (XU *et al.* 2009). We observed that a single amino acid  
132 substitution in UNC-40 will allow UNC-40 to asymmetrically localize to different surfaces in the  
133 absence of UNC-6. The binding of UNC-6 to this UNC-40 molecule causes localization to the  
134 surface nearest the UNC-6 source. However, the binding of UNC-6 with a single amino acid  
135 substitution will enhance the asymmetric localization to different surfaces. A second-site UNC-  
136 6 amino acid substitution will suppress this enhancement and increase UNC-40 asymmetric  
137 localization at the surface towards the UNC-6 source. These results indicate that UNC-40  
138 conformational changes differentially influence each activity. In the context of feedback loops,  
139 UNC-40 activity regulates both the positive and negative loops that control the asymmetric  
140 localization of UNC-40 to the plasma membrane. Because the system is controlled by the  
141 conformation of the molecule, randomness will be introduced in the system by stochastic  
142 fluctuations in ligand-receptor binding and by stochastic conformational changes.

143

144 The outcome of an UNC-40 receptor's activity is to either cause an UNC-40 receptor to localize  
145 to the site of UNC-6 interaction or to a different site (Figure 1). This is an important discovery  
146 because it means that the asymmetric localization events are mutually exclusive and, therefore,  
147 there is statistical dependence. We refer to this process as 'statistically dependent asymmetric  
148 localization' (SDAL). This model states that the probability of UNC-40 localizing and mediating  
149 outgrowth at the site of UNC-6 interaction affects the probability of UNC-40 localizing and  
150 mediating outgrowth at another site, and vice versa. We have found that other extracellular  
151 cues can also affect UNC-40 asymmetric localization, and thus can influence the probability of  
152 UNC-40-mediated outgrowth from different sites (TANG AND WADSWORTH 2014; YANG *et al.*  
153 2014).

154

155 The development of an extension can be considered as a stochastic process. At any one  
156 instance of time at innumerable sites along the neuron's surface, UNC-40 interacts with UNC-6  
157 to mediate UNC-40 asymmetric localization and the outgrowth response. At the next instance  
158 of time, other UNC-40 receptors, including any just transported to the surface, may interact  
159 with UNC-6. Because the plasma membrane is a fluid, the forces generated by the outgrowth  
160 response are not always acting in parallel and the direction of outward force can fluctuate  
161 (Figure 2A). It is the collective impact of all outgrowth events over a period of time that allows  
162 the extension to form. The outward movement of an extension could be precisely described if  
163 the effect of each outgrowth event were known. However, it is extremely difficult to measure  
164 the effect of each single event since there are innumerable events happening at each instance of  
165 time. We also argue that the pattern of UNC-40 localization and outgrowth across the surface of  
166 the membrane evolves over time through a random process. Therefore, the outgrowth events



167 can only be described probabilistically, and as such the time evolution of extension is also  
168 probabilistic in nature.

169

170 Understanding the role a gene plays in controlling outgrowth movement might require  
171 knowledge of its role in regulating this stochastic process. To do this, we use the direction of  
172 HSN extension. We reason that the collective impact of all the outgrowth events over a period  
173 of time cause the development of the HSN axon. The direction of extension from the cell body  
174 has a probability of being orientated in one direction (KULKARNI *et al.* 2013; TANG AND  
175 WADSWORTH 2014; X AND WG 2014; YANG *et al.* 2014). Mathematically, the direction of HSN  
176 extension is a variable that takes on different values; “anterior”, “posterior”, “ventral”, and  
177 “dorsal”. A probability is associated with each outcome, thus creating a probability  
178 distribution. This distribution describes the effect that all the outgrowth events had over a  
179 period of time. During normal development, the probability of each UNC-40-mediated  
180 outgrowth event being ventrally oriented is very high and a ventral extension develops. We  
181 have shown that certain gene mutations affect the probability distribution, thus revealing that a  
182 gene plays a role in the stochastic process. We can compare wildtype and mutants to gage the  
183 degree to which a mutation causes the direction of extension to fluctuate. This reflects the  
184 degree to which the mutation has caused the direction of outgrowth activity, and the outward  
185 force it creates, to fluctuate over the course of extension development.

186

187 We argue that understanding the function of a gene in terms of a stochastic model of membrane  
188 movement is useful. Often the goal of a genetic analysis of axon guidance is to uncover a  
189 molecular mechanism. Frequently, a deterministic model is made which describe some  
190 molecular event that the gene affects. Because the mutation affects axon guidance, the

191 molecular event plays a role in causing directed movement. However, these models tend to  
192 reduce a complex biological process to an isolated component. In reality, understanding how a  
193 molecular event is able to cause directed movement requires knowledge of all the many ways  
194 in which the event influences, and is influenced by, the other molecular events of directed  
195 movement. A stochastic model is a useful tool of exploring how a gene affects the overall  
196 behavior of the system. To make an analogy, a roulette wheel can be described  
197 deterministically; if every force acting on the ball at every instance of time is known than the  
198 number on which the ball stops can be precisely determined. The role of a component of the  
199 roulette wheel could be described by the effect that it has on the forces which act on the ball at  
200 every instance of time. However, understanding how the effect of this component causes a  
201 particular outcome require understanding the effects of all the other components. Because this  
202 is so complex, the outcome of a roulette wheel is studied using a stochastic model. That is, how  
203 does the component affect the probability of the ball stopping on a particular number. A  
204 roulette wheel must be exactly levelled to have an equal probability for each number.  
205 Removing a component of the wheel can cause the wheel to tilt in a particular manner. This  
206 will result in a new outcome, *i.e.* the ball will have a higher probability of stopping on certain  
207 numbers. Although this does not reveal the precise event that occurs between the component  
208 and the ball, it will reveal the effect that the component has in determining an outcome.  
209 Further, by studying the effect of removing multiple components, relationships that lead to  
210 particular outcomes can be revealed.

211

212 The third concept of our model is that neuronal membrane outgrowth is a mass transport  
213 phenomena which can be described as advection and diffusion (Figure 2). Signaling by UNC-40  
214 receptors along a surface of the neuron can lead to cytoskeletal changes which create force and  
215 membrane movement (Figure 2A). As a result, there is a mean flow of membrane mass in an

216 outward direction (Figure 2B). This motion is advection, which is mass transport by a mean  
217 velocity field. In addition to advection, membrane mass transport also occurs through random  
218 movement, *i.e.* diffusion. Because the cell membrane is fluid, membrane mass will move in  
219 different directions as the membrane is subjected to forces which change its shape (Figure 2C).  
220 The degree to which the membrane mass undergoes random movement is important because  
221 diffusion processes and advection processes have different effects on the extent to which mass  
222 will be displaced outward in a given amount of time. The random movements can be  
223 mathematically described using random walks. A random walk is a succession of randomly  
224 directed steps (Figure 2D). Random walk models are used to describe many diverse types of  
225 behavior, including the movement of a particle through fluid, the search pattern of a foraging  
226 animal, and the fluctuating price of a stock. The behavior of neuronal growth cone movement  
227 during chemotaxis has also been modeled using random walks (KATZ *et al.* 1984; BUETTNER *et al.*  
228 1994; ODDE AND BUETTNER 1995; WANG *et al.* 2003; MASKERY *et al.* 2004). However, rather than  
229 using a random walk model to describe the gross morphological changes observed during  
230 growth cone movement, in this study the random walk is used to model the random movement  
231 of membrane mass in order to understand how gene activity influences the outward  
232 displacement of the membrane. A property of random motion is that the mean square  
233 displacement grows proportionate to the time traveled. This means that the more the direction  
234 of movement fluctuates, the shorter the distance of travel in a given amount of time (Figure 2E).  
235 The model predicts that if force is applied to the membrane in a manner that increases random  
236 movement then the outward displacement of the membrane's mass will decrease.

237

238 Because of the effect random movement has on displacement, the SDAL model makes  
239 predictions about how UNC-40 activity affects the rate of extension. In a deterministic model,  
240 outgrowth activity causes straight-line outward motion from the site of interaction. The SDAL

241 model predicts that the interaction between UNC-40 and UNC-6 increases the probability that  
242 UNC-40 asymmetric localization and UNC-40-mediated outgrowth will be oriented at the site of  
243 interaction. It also decreases the probability that localization and outgrowth will be oriented  
244 elsewhere. Therefore, the interaction influences the spatial distribution of UNC-40 along the  
245 surface and, in doing so, will change the way forces are applied to the membrane. As this  
246 process continues over time, the direction of the forces acting on the fluid membrane fluctuates.  
247 This will alter the advective and diffusive transport of membrane mass. As an example, if the  
248 probability of ventral outgrowth is 0.33, of anterior outgrowth is 0.33, and posterior outgrowth  
249 is 0.33 then there will be a high degree of random movement. Interactions between UNC-40  
250 and UNC-6 at the leading ventral surface could shift the probabilities for ventral outgrowth to  
251 0.8, for anterior outgrowth to 0.1, and for posterior outgrowth to 0.1. This change will decrease  
252 the degree to which the direction of outgrowth fluctuates. As modeled in Figure 2E, this will  
253 increase displacement, meaning that the membrane mass now will be able to travel further  
254 outwards over a given amount of time. It is worth noting that fluctuations in the direction of  
255 outgrowth activity could occur as very rapid minute movements of membrane mass. When  
256 observed at the macro-scale, these micro-scale fluctuations might not be seen. Instead, the  
257 outward movement of an extension will appear as linear, straight-line, movement. In this  
258 paper, “fluctuation” refers to variation in the direction of outgrowth activity. “Outgrowth”  
259 refers to the movement of membrane mass at the micro-scale, whereas “extension” refers to the  
260 movement of the axon that is observed at the macro-scale.

261

262 The SDAL model makes distinctive predictions about UNC-40-mediated outgrowth activity *in*  
263 *vivo* and the direction of extension. In a deterministic model, the direction of extension is  
264 determined by the outward movement of the membrane from the site where UNC-6 and UNC-  
265 40 interact. Positional information is encoded by gradients so that UNC-6 guides extension

266 towards the UNC-6 source. In the SDAL model, UNC-6 and other extracellular cues govern the  
267 probability of UNC-40 asymmetric localization, and subsequent UNC-40-mediated outgrowth,  
268 at each surface of the membrane (XU *et al.* 2009; KULKARNI *et al.* 2013). The direction of  
269 outgrowth is determined by a directional bias that is created over time by the combined effect  
270 of extracellular cues. If, for example, the probability of outgrowth towards a ventral UNC-6  
271 source is 0.3 and the probability of dorsal outgrowth is 0.3 and of anterior outgrowth is 0.4, the  
272 direction of outgrowth will be in the anterior direction. That is, at any instance of time there is  
273 a chance that outgrowth movement will be directed ventrally towards the UNC-6 source,  
274 however over a longer period of time the outgrowth will travel anteriorly because there is  
275 always a greater likelihood that outgrowth will be anterior instead of ventral or dorsal. To  
276 reiterate, the direction of extension is a product of a stochastic process, in which the outcome  
277 evolves over time. The probability of ventral outgrowth created by the UNC-40-mediated  
278 response to UNC-6 is required for the anterior bias. Without the ventrally directed outgrowth  
279 in response to UNC-6, the probability of ventral outgrowth would decrease, shifting the  
280 directional bias. Thus, when considered as a stochastic process, the observed directional  
281 response to the interactions between UNC-40 and UNC-6 is not necessarily extension towards  
282 the UNC-6 source. Because of SDAL, positional information is encoded by the location and level  
283 of the extracellular cues along the surface of the neuron.

284

285 The SDAL model suggested that UNC-40 activity could affect extension movement in ways that  
286 had not been obvious. The first insight is that forward movement of an extension could be  
287 inhibited as it moves towards a source of a cue that promotes outgrowth (Figure 3A). At the  
288 leading edge of an outgrowth, a strong directional basis for movement towards an UNC-6  
289 source occurs only as long as the probability of UNC-40 localization at surfaces facing towards  
290 the source are greater than the probability of UNC-40 localization at surfaces facing other

291 directions. As an extension moves towards an UNC-6 source a higher proportion of the UNC-40  
292 receptors that flank the leading edge can become ligated (Figure 3B). Because of the SDAL  
293 process, this will increase the probability of localization and outgrowth at the flanking sites  
294 while decreasing the probability of localization and outgrowth at the leading edge. The result  
295 will be an increase in random movement and a decrease in the outward displacement of the  
296 membrane's mass. Paradoxically, the rate of extension will decrease as the extension moves  
297 towards the UNC-6 source (Figure 3C). It is worth noting that even if the probability of  
298 outgrowth in each direction becomes equal, there will still be a directional bias. For example, if  
299 the probability of outgrowth towards a ventral UNC-6 source is 0.33 and of anterior outgrowth  
300 is 0.33 and of posterior outgrowth is 0.33, the directional bias is ventral. (The probability of  
301 movement in the direction of the axon shaft (backwards) is low.)

302

303 A second insight is that an extension could move towards the source of a cue that inhibits  
304 outgrowth (Figure 3A). For example, if together the extracellular cues create a probability for  
305 ventral outgrowth of 0.7, for anterior outgrowth of 0.15, and for posterior outgrowth of 0.15, a  
306 directional bias for ventral outgrowth is created (Figure 3B). This can occur even if there is a  
307 ventral source of an inhibitory cue. The extension can move ventrally towards this inhibitory  
308 cue source. Eventually the probability for ventral outgrowth might change to 0.33, anterior to  
309 0.33, and posterior to 0.33 (Figure 3C). But even in this case, there is still a directional bias for  
310 ventral outgrowth and extension will continue to move towards the source of the inhibitory  
311 cue.

312

313 The model predicts that movement towards a source of a cue causes the system to trend  
314 towards a state where the probabilities of outgrowth in different directions become equal.

315 Axons often change their trajectory near the source of a cue. It is possible that the state is  
316 important because the equilibrium might allow cues to be more effectual at reorienting  
317 outgrowth (Figure 4).

318

319 The third insight is that multiple extensions from a neuron could move in the same direction  
320 without having to follow prepatterned extracellular pathways. Some neurons send out multiple  
321 extensions that run in parallel towards a target. It is commonly proposed that these patterns  
322 form because extensions follow parallel pathways that were previously formed by extracellular  
323 guidance cues. The SDAL model suggests that multiple UNC-40-mediated outgrowths can be  
324 initiated at a leading surface and that multiple extensions can maintain their positions without  
325 having to follow prepatterned extracellular pathways. In this model, a separate extension  
326 begins to form at the leading edge because the directional bias at one site becomes greater than  
327 that at flanking sites. We propose that along the leading edge the self-organizing UNC-40  
328 localization process can create multiple sites that have a greater directional bias (Figure 5A).  
329 The positive and negative feedback loops of the SDAL process can allow spatial patterns of  
330 outgrowth to develop autonomously. Once these sites are established, outgrowth can proceed  
331 from each site in the same direction (Figure 5B). The strongest directional bias is created when  
332 the probabilities for outgrowth are equal in the directions perpendicular to the direction of  
333 extension. The actual value of the perpendicular probabilities is not crucial for establishing a  
334 directional bias. Even though the value of the perpendicular probabilities may vary depending  
335 on the position of outgrowth along the perpendicular axis, the direction of outgrowth will be  
336 the same. If a perpendicular equilibrium is maintained, then cues that affect UNC-40  
337 localization and outgrowth and which are distributed along the perpendicular axis will have  
338 little effect on the direction of outgrowth. Such an equilibrium can be established if the  
339 outgrowth effects of cues distributed along the perpendicular axis balance out each other. Such

340 a condition could be established by cues that effect outgrowth equally at surfaces facing the  
341 perpendicular axis. Even if cues are distributed in a gradient an equilibrium could exist.  
342 Studies indicate that gradient steepness, rather than the concentration of cues, is important for  
343 growth cone turning and guidance (BAIER AND BONHOEFFER 1992; ROSOFF *et al.* 2004; MORTIMER *et*  
344 *al.* 2010; SLOAN *et al.* 2015). Therefore, cues may create a perpendicular equilibrium if they are  
345 distributed in a shallow gradient along the perpendicular axis.

346

347 A fourth insight is that cues can direct movement without being in a concentration gradient.  
348 The SDAL activity within the cell initiates random walk movement. As long as an equilibrium  
349 along the perpendicular axis exists, a directional bias along the other axis can be created. In  
350 Figure 5B outgrowth is towards a ventral cue source, and as outgrowth moves up the  
351 concentration gradient of this cue the probability of outgrowth in each direction changes.  
352 However, movement towards the source would still occur if the concentration of extracellular  
353 cues remains constant and the probabilities never change. Because of the SDAL process, a  
354 directional bias can be maintained along a track of a uniformly distributed cue.

355

356 The last insight is that extracellular cues could affect UNC-40 localization and outgrowth, but  
357 not affect the direction of outgrowth. However, these cues could have an effect on the  
358 morphology and patterning of an extension. A candidate for such a cue is EGL-20 (wnt). The  
359 *egl-20* gene is one of several Wnt genes in *C. elegans*. These genes are expressed in a series of  
360 partially overlapping domains along the anteroposterior axis of the animal (SAWA AND  
361 KORSWAGEN 2013). EGL-20 is expressed in cells posterior to HSN (WHANGBO AND KENYON 1999;  
362 PAN *et al.* 2006; HARTERINK *et al.* 2011). The sources of UNC-6 and EGL-20 are roughly  
363 perpendicular to each other. We have observed that loss of EGL-20 function causes UNC-40



364 asymmetrical localization to orient to randomly selected surfaces of HSN and causes the axon to  
365 initially extend from the HSN cell body in different directions (KULKARNI *et al.* 2013; TANG AND  
366 WADSWORTH 2014). UNC-6 and EGL-20 signaling could both impinge on the feedback loops that  
367 regulate UNC-40 SDAL. In doing so, these cues would act together to influence the pattern of  
368 extension. In this paper, we provide further genetic evidence that the downstream signals from  
369 both cues converge to regulate the UNC-40 SDAL process.

370

371 We suggest that UNC-5 plays an important role in coordinating the UNC-40 SDAL process with  
372 non-UNC-40-mediated responses that affect outgrowth. Previously we reported that loss of  
373 UNC-5 causes UNC-40 asymmetrical localization to orient to randomly selected surfaces of HSN,  
374 causing the axon to initially extend in different directions (KULKARNI *et al.* 2013). This suggests  
375 that UNC-5 functions to increase the probability of UNC-40 asymmetric localization being  
376 oriented to the site of UNC-6 and UNC-40 interaction. That is, UNC-5 promotes straight-line  
377 motion by inhibiting the degree to which the direction of UNC-40-mediated outgrowth  
378 fluctuates. UNC-5 has other functions as well. UNC-5 is primarily known for its role in  
379 mediating movement away from UNC-6 sources. For example, UNC-5 is required for the dorsal  
380 migration of DA and DB motor neuron axons away from ventral UNC-6 sources (HEDGECKOCK *et*  
381 *al.* 1990). DA and DB guidance utilizes both UNC-40-dependent and UNC-40-independent  
382 pathways, although guidance is significantly less disrupted by loss of UNC-40 than by loss of  
383 UNC-5 (HEDGECKOCK *et al.* 1990; MACNEIL *et al.* 2009). In keeping with the SDAL model, we  
384 predict that UNC-5 increases the probability of non-UNC-40-mediated outgrowth being  
385 oriented towards sites where there are not interactions with UNC-6. This increases the  
386 probability of outgrowth movement in directions not towards UNC-6 sources. Finally, we  
387 predict that UNC-5 function can also increase the probability that non-UNC-40-mediated  
388 outgrowth will orient to the site of interaction between non-UNC-40 receptors and non-UNC-6

389 extracellular cues. Evidence for this comes from the observation that in *rpm-1* mutants the  
390 overextension of the PLM axon can be suppressed by loss of UNC-5, but not by the loss of UNC-  
391 40 or UNC-6 (Li *et al.* 2008). In summary, we believe UNC-5 can: 1) increase the probability of  
392 UNC-40-mediated outgrowth at the sites of UNC-6 and UNC-40 interactions; 2) decrease the  
393 probability of UNC-40-mediated outgrowth at sites where UNC-6 is not present; 3) decrease the  
394 probability of non-UNC-40-mediated outgrowth at the site of UNC-6 and UNC-40 interactions;  
395 and 4) increase the probability of non-UNC-40-mediated outgrowth at sites where there are no  
396 UNC-6 interactions. These functions can be considered in terms of the positive and negative  
397 feedback loops of the SDAL model (Figure 6), where UNC-5 helps regulated the feedback loops  
398 associated with UNC-40 activity.

399

400 Because of these ideas, we reasoned that UNC-5 activity could affect extension movement in  
401 ways that had not been obvious to us. First, UNC-5 might affect the patterning of extension that  
402 travels *towards* an UNC-6 source. As discussed above, previous evidence suggests UNC-5  
403 regulates the asymmetric localization of UNC-40. UNC-5 interactions with UNC-6 and UNC-40  
404 could influence the feedback loops (Figures 1 and 6). By regulating the degree to which the  
405 direction of UNC-40-mediated outgrowth fluctuates, UNC-5 could affect random movement and  
406 the outward displacement of membrane mass. This could affect the rate of extension towards  
407 an UNC-6 source or whether extension can occur. In cases where multiple extensions form  
408 from a surface, the effect UNC-5 has on the loops could influence whether sites with a  
409 predominate directional bias can be established.

410

411 Second, UNC-5 could play a role in determining whether an extension changes direction. As  
412 discussed earlier, if the UNC-40 receptors become saturated near an UNC-6 source then the

413 probability of UNC-40-mediated outgrowth towards the source and along the perpendicular  
414 axis tends to become equal. At this point, even a small increase in the probability of non-UNC-  
415 40-mediated outgrowth to the site of non-UNC-6 and non-UNC-40 interactions could alter the  
416 directional bias (Figure 4). A change in UNC-5 activity could help promote a shift from a  
417 directional bias determined by UNC-40 and UNC-6 interactions, to one determined by non-  
418 UNC-40 and non-UNC-6 interaction.

419

420 Because of the predictions that the UNC-40 SDAL model makes, we decided to reexamine the  
421 *unc-5* loss-of-function phenotypes and to investigate genetic interactions among *unc-5*, *unc-6*,  
422 *unc-40* and *egl-20* that regulated the asymmetric localization of UNC-40. We find evidence that  
423 UNC-5 regulates the length and number of processes that extend towards an UNC-6 source and  
424 that UNC-5 helps control the ability of axons to extend in different directions. In addition, we  
425 find genetic interactions that suggest UNC-5, together with UNC-53 (NAV2), functions to  
426 regulate UNC-40 SDAL in response to the UNC-6 and EGL-20 (wnt) extracellular cues. We  
427 suggest that the SDAL model is useful for understanding how genes regulate the patterning of  
428 axon extensions.

429

## 430 **Materials and Methods**

### 431 **Strains**

432 Strains were handled at 20 °C using standard methods (Brenner, 1974) unless stated otherwise. A  
433 Bristol strain N2 was used as wild type. The following alleles were used: **LG I**, *unc-40(e1430)*, *unc-*  
434 *40(ur304)*, *zdis5[mec-4::GFP]*; **LG II**, *unc-53(n152)*; **LG IV**, *unc-5(e152)*, *unc-5(e53)*, *unc-5(ev480)*, *unc-*  
435 *5(ev585)*, *egl-20(n585)*, *kyls262[unc-86::myr-GFP;odr-1::dsRed]*; **LG V**, *madd-2(ky592)*, *madd-2(tr103)*;  
436 **LG X**, *mig-15(rh148)*, *unc-6(ev400)*, *sax-3(ky123)*, *sax-3(ky200)*.

437 Transgenes maintained as extrachromosomal arrays included: *kyEx1212 [unc-86::unc-40-GFP;odr-*  
438 *1::dsRed]*.

439

### 440 **Analysis of axon outgrowth and cell body position**

441 HSN neurons were visualized using expression of the transgene *kyls262[unc-86::myr-GFP]*. The  
442 mechanosensory neurons, AVM, ALM, and PLM, were visualized using the expression of the transgene  
443 *zdis5[Pmec-4::GFP]*. Synchronized worms were obtained by allowing eggs to hatch overnight in M9  
444 buffer without food. The larval stage was determined by using differential interference contrast (DIC)  
445 microscopy to examine the gonad cell number and the gonad size. Staged larvae were mounted on a 5%  
446 agarose pad with 10 mM levamisole buffer. Images were taken using epifluorescent microscopy with a  
447 Zeiss 63X water immersion objective.

448

449 The number of processes during early L1 larval stage was scored by counting the number of processes  
450 that extended for a distance greater than the length of one cell body. We report instances in which there  
451 were no such processes, one process or more than one processes. In the L2 larval stage, a single early  
452 process was scored if there was only one major extension from the ventral leading edge. The HSN cell  
453 body in L2 stage larvae was scored as dorsal if the cell body had failed to migrate ventrally and was not

454 positioned near the PLM axon. In L4 stage larvae, a multiple ventral processes phenotype was scored if  
455 more than one major extension protruded from the ventral side of cell body.

456

457 Extension into the nerve ring was scored as defective if the axon did not extend further than  
458 approximately half the width of the nerve ring. Anterior extension was scored as defective if the axon  
459 did not extend further anteriorly than the nerve ring. PLM axons are scored as over-extending if they  
460 extended further anterior than the position of the ALM cell body.

461

### 462 **Analysis of the direction of HSN outgrowth**

463 HSN was visualized using the transgene *kyIs262[unc-86::myr-GFP]*. L4 stage larvae were mounted on a  
464 5% agarose pad with 10 mM levamisole buffer. An anterior protrusion was scored if the axon extended  
465 from the anterior side of the cell body for a distance greater than the length of three cell bodies. A dorsal  
466 or posterior protrusion was scored if the axon extended dorsally or posteriorly for a distance greater  
467 than two cell body lengths. HSN was considered multipolar if more than one process extended a length  
468 greater than one cell body. Images were taken using epifluorescent microscopy with a Zeiss 40X  
469 objective.

470

### 471 **Analysis of the UNC-40::GFP localization in L2 stage animal**

472 For analysis of UNC-40::GFP localization, L2 stage larvae with the transgenic marker *kyEx1212[unc-*  
473 *86::unc-40::GFP; odr-1::dsRed]* were mounted on a 5% agarose pad with 10 mM levamisole buffer.  
474 Staging was determined by examining the gonad cell number and the gonad size under differential  
475 interference contrast (DIC) microscopy. Images were taken using epifluorescent microscopy with a  
476 Zeiss 63X water immersion objective. The UNC-40::GFP localization was determined by measuring the  
477 average intensity under lines drawn along the dorsal and ventral edges of each HSN cell body by using

478 ImageJ software. For analysis of the anterior–posterior orientation of UNC-40::GFP, the dorsal segment  
479 was geometrically divided into three equal lengths (dorsal anterior, dorsal central and dorsal posterior  
480 segments). The line-scan intensity plots of each of these segments were recorded. ANOVA test was used  
481 to determine if there is a significant difference between intensities of the three segments. The dorsal  
482 distribution was considered uniform if  $p \geq 0.05$  and was considered asymmetrical if  $p \leq 0.05$ . Within an  
483 asymmetric population, the highest percent intensity was considered to localize UNC-40::GFP to either  
484 anterior, posterior or central domain of the dorsal surface.

485

## 486 **Computations**

487 A program to simulate a two-dimensional lattice random walk based on the probability of dorsal,  
488 ventral, anterior, and posterior outgrowth for a mutant (Table 1) was created using MATLAB. (The  
489 directions of the axons from multipolar neurons were not scored. These axons appear to behave in the  
490 same manner as the axons from monopolar neurons, but this has not yet been tested.) The probability  
491 of dorsal, ventral, anterior, or posterior outgrowth was assigned for the direction of each step of a  
492 random walk moving up, down, left or right, respectively (Figure 9). Each variable is considered  
493 independent and identically distributed. Simulations of 500 equal size steps (size =1) were plotted for  
494 50 tracks (Figure 1B, 5B and 6B inserts). A Gaussian distribution for the final positions of the tracks was  
495 generated using Matlab's random function (Figure 6).

496

497 The mean squared displacement (MSD) is used to provide a quantitative characteristic of the motion  
498 that would be created by the outgrowth activity undergoing the random walk. Using the random walks  
499 generated for a mutant the MSD can be calculated:

$$500 \quad msd(\tau) = \langle [r(t + \tau) - r(t)]^2 \rangle$$

501 Here,  $r(t)$  is the position at time  $t$  and  $\tau$  is the lag time between two positions used to calculate the  
502 displacement,  $\Delta r(\tau) = r(t+\tau) - r(t)$ . The time-average over  $t$  and the ensemble-average over the 50  
503 trajectories were calculated. This yields the MSD as a function of the lag time. A coefficient giving the  
504 relative rate of diffusion was derived from a linear fit of the curve. The first two lag time points were  
505 not considered, as the paths often approximate a straight line at short intervals.

## 506 **Results**

### 507 **UNC-5 regulates the pattern of outgrowth from the HSN neuron**

508 To investigate whether UNC-5 activity can regulate the length or number of processes that a  
509 neuron can develop when outgrowth is towards an UNC-6 source, we examined the  
510 development of the HSN axon in *unc-5* mutations. The HSN neuron sends a single axon to the  
511 ventral nerve cord, which is a source of the UNC-6 cue (WADSWORTH *et al.* 1996; ADLER *et al.*  
512 2006; ASAKURA *et al.* 2007). Axon formation is dynamic (ADLER *et al.* 2006). Shortly after  
513 hatching, HSN extends short neurites in different directions. These neurites, which dynamically  
514 extend and retract filopodia, become restricted to the ventral side of the neuron where a  
515 leading edge forms. Multiple neurites extend from this surface until one develops into a single  
516 axon extending to the ventral nerve cord. Measurements of growth cone size, maximal length,  
517 and duration of growth cone filopodia indicate that UNC-6, UNC-40, and UNC-5 control the  
518 dynamics of protrusion (NORRIS AND LUNDQUIST 2011).

519

520 We observe that in *unc-5* mutants, the patterns of extension are altered. In wild-type animals at the  
521 L1 stage of development most HSN neurons extends more than one short neurite, however in *unc-*  
522 *5(e53)* mutants nearly half the neurons do not extend a process (Figures 7A and 7B). During the L2  
523 stage in wild-type animals a prominent ventral leading edge forms and the cell body undergoes a  
524 short ventral migration that is completed by the L3 stage. By comparison, in *unc-5* mutants the cell  
525 body may fail to migrate and instead a single large ventral process may form early during the L2  
526 stage (Figures 7A, 7C and 7E). It may be that the ventral migration of the HSN cell body requires the  
527 development of a large leading edge with multiple extensions. Together the observations indicate  
528 that loss of *unc-5* function affects the patterning of outgrowth, *i.e.* the timing, length, and number of  
529 extensions that form. Loss of *unc-5* function does not prevent movement, in fact, a single large



530 ventral extension can form in the mutant at a time that is even earlier than when a single ventral  
531 extension can be observed in wildtype. The earlier appearance of a single ventral extension in *unc-5*  
532 mutants appears to be the result of a difference in morphology, rather than of developmental timing.  
533 The failure of the HSN cell body to migrate ventrally and the different pattern of outgrowth at the  
534 leading edge causes an earlier discernable single extension.

535

536 We tested four different *unc-5* alleles in these experiments. The *unc-5(e53)* allele is a putative  
537 molecular null allele, *unc-5(ev480)* is predicted to truncate UNC-5 after the cytoplasmic ZU-5  
538 domain and before the Death Domain, *unc-5(e152)* is predicted to truncate UNC-5 before the  
539 ZU-5 domain and Death Domain, and *unc-5(ev585)* is a missense allele that affects a predicted  
540 disulfide bond in the extracellular Ig(C) domain (KILLEEN *et al.* 2002). Although both the *unc-*  
541 *5(ev480)* and *unc-5(e152)* are predicted to cause premature termination of protein translation  
542 in the cytodomain, the *unc-5(e152)* product retains the signaling activity that prevents these  
543 phenotypes. Based on other phenotypes, previous studies reported that the *unc-5(e152)* allele  
544 retains UNC-40-dependent signaling functions (MERZ *et al.* 2001; KILLEEN *et al.* 2002).

545

## 546 **UNC-5 is required for the induction of multiple HSN axons by UNC-6 $\Delta$ C and a *mig-15*** 547 **mutation**

548 The results above suggest that UNC-5 activity can regulate the number of HSN extensions that  
549 form. To further test this hypothesis, we checked whether loss of UNC-5 function can suppress  
550 the development of additional processes that can be induced. Previously we reported that  
551 expression of the N-terminal fragment of UNC-6, UNC-6 $\Delta$ C, induces excessive branching of  
552 ventral nerve cord motor neurons and that loss of UNC-5 function can suppress this branching  
553 (LIM *et al.* 1999). We now report that HSN develops an extra process in response to UNC-6 $\Delta$ C

554 and that loss of UNC-5 function suppresses the development of this extra process (Figures 7D  
555 and 7F).

556

557 To investigate whether this UNC-5 activity might involve known effectors of asymmetric neuronal  
558 outgrowth, we tested for genetic interactions between *unc-5* and both *mig-10* and *mig-15*. MIG-10  
559 (lamellipodin) is a cytoplasmic adaptor protein that can act cell-autonomously to promote UNC-40-  
560 mediated asymmetric outgrowth (ADLER *et al.* 2006; CHANG *et al.* 2006; QUINN *et al.* 2006; QUINN  
561 *et al.* 2008; MCSHEA *et al.* 2013). MIG-15 (NIK kinase) is a cytoplasmic protein and evidence  
562 indicates that *mig-15* functions cell-autonomously to mediate a response to UNC-6 (POINAT *et al.*  
563 2002; TEULIÈRE *et al.* 2011). It's proposed that *mig-15* acts with *unc-5* to polarize the growth cone's  
564 response and that it controls the asymmetric localization of MIG-10 and UNC-40 (TEULIÈRE *et al.*  
565 2011; YANG *et al.* 2014). We previously noted that HSN neurons often become bipolar in *mig-15*  
566 mutants and frequently UNC-40::GFP is localized to multiple surfaces in a single neuron, suggesting  
567 that loss of MIG-15 enhances the ability of UNC-40::GFP to cluster (YANG *et al.* 2014). In our  
568 experiments we used the *mig-10* (*ct141*) loss-of-function allele (MANSER AND WOOD 1990; MANSER  
569 *et al.* 1997) and the *mig-15*(*rh148*) allele, which causes a missense mutation in the ATP-binding  
570 pocket of the kinase domain and is a weak allele of *mig-15* (SHAKIR *et al.* 2006; CHAPMAN *et al.*  
571 2008).

572

573 We find that the extra processes induced by UNC-6 $\Delta$ C expression are suppressed by *mig-*  
574 *10*(*ct141*) (Figurs 7F). We also find that the *mig-15* mutation causes extra HSN processes and  
575 that the loss of UNC-5 function suppresses these extra HSN processes (Figures 7F and 7G).  
576 These results support the hypothesis that the ability of UNC-5 to regulate the development of

577 multiple protrusions involves the molecular machinery that controls UNC-40-mediated  
578 asymmetric neuronal outgrowth.

579

### 580 **UNC-5 is required for PLM overextension**

581 The SDAL model predicts that the ability of UNC-5 to regulate the length and number of neural  
582 protrusions is independent of the direction of outgrowth. HSN sends a single axon ventrally, while  
583 PLM sends an axon anteriorly from a posteriorly positioned cell body. The HSN axon travels  
584 towards UNC-6 sources, whereas the PLM axon pathway is perpendicular to UNC-6 sources. To  
585 investigate whether UNC-5 activity can regulate the length or number of processes that develop  
586 perpendicular to UNC-6 sources we examined the development of the PLM axon. We also chose  
587 PLM because UNC-5 was already known to affect the length of the PLM axon (Li *et al.* 2008).

588

589 Given that UNC-5 activity is involved in the overextension of the PLM axon, and that the *mig-15*  
590 mutation affects HSN outgrowth in an UNC-40 dependent fashion, we decided to test whether  
591 PLM overextension might be induced by the *mig-15* mutation in an UNC-40-dependent fashion.  
592 The HSN results suggest that altering *mig-15* function creates a sensitized genetic background.  
593 That is, the *unc-5(ev480)* mutation suppresses HSN outgrowth extension in both the wild-type  
594 and *mig-15(rh148)* backgrounds, but the *mig-15* mutation creates a stronger patterning  
595 phenotype. This idea is supported by the evidence that the *mig-15* mutation enhances the  
596 ability of UNC-40 to localize at surfaces (YANG *et al.* 2014).

597

598 We find that in *mig-15(rh148)* mutants the PLM axon often fails to terminate at its normal  
599 position and instead extends beyond the ALM cell body. This overextension is suppressed in  
600 *unc-5(e53);mig-15(rh148)* and *unc-40(e1430);mig-15(rh148)* mutants (Figures 8A and 8B).

601 The results are consistent with the idea that UNC-5 is required for the UNC-40-mediated  
602 outgrowth activity that causes overextension in *mig-15(rh148)* mutants.

603

#### 604 **UNC-5 is required for ALM and AVM branching and extension**

605 We also investigated the effect of UNC-5 activity on patterning where sources of UNC-6 and  
606 other cues are in a more complex arrangement. Specifically, we examined whether UNC-5 plays  
607 a role in the outgrowth of AVM and ALM processes at the nerve ring. During larval  
608 development, processes from the AVM neuron and the two ALM neurons (one on each side of  
609 the animal) migrate anteriorly to the nerve ring at dorsal and ventral positions respectively  
610 (Figure 8C). At the nerve ring each axon branches; one branch extends further anteriorly and the  
611 other extends into the nerve ring. Evidence suggests that at the midbody of the animal the  
612 positioning of these axons along the dorsal-ventral axis requires UNC-6, UNC-40, and UNC-5  
613 activity. In *unc-6*, *unc-40*, and *unc-5* null mutants, or when the UNC-6 expression pattern is altered,  
614 the longitudinal nerves are mispositioned (REN *et al.* 1999). Glia cells and neurons at the nerve ring  
615 are sources of UNC-6 (WADSWORTH *et al.* 1996). The guidance of some axons in the nerve ring are  
616 disrupted in *unc-6* and *unc-40* mutants (HAO *et al.* 2001; YOSHIMURA *et al.* 2008). The precise  
617 spatial and temporal arrangement of the UNC-6 cue in relationship to the position of the  
618 migrating growth cones is not fully understood. Nevertheless, the anteriorly migrating growth  
619 cones appear to use the UNC-6 cue from the ventral sources to help maintain the correct dorsal-  
620 ventral position, even while moving towards the nerve ring, which is a new source of UNC-6  
621 that is perpendicular to the ventral source. At the nerve ring the axons branch. One process  
622 continues anteriorly, moving past the new UNC-6 source, whereas the other projects at a right  
623 angle and moves parallel to the new source.

624

625 We find genetic interactions involving *unc-5*, *unc-40*, and *mig-15* that affect outgrowth  
626 patterning of the ALM and AVM extensions at the nerve ring (Figures 8C, 8D, and 8E). In *mig-*  
627 *15(rh148);unc-5(e53)* mutants, the AVM axon often fails to extend anteriorly from the branch  
628 point and only extends into the nerve ring, or it fails to extend into the nerve ring and only  
629 extends anteriorly, or it fails to do both and terminates at this point. In *unc-40(e1430)* mutants,  
630 the axon often fails to branch into the nerve ring, although it extends anteriorly. In comparison,  
631 in *unc-40(e1430);mig-15(rh148)* mutants more axons extend into the nerve ring. These results  
632 suggest that UNC-5 (and MIG-15) helps regulate UNC-40-mediated outgrowth to pattern the  
633 outgrowth at the nerve ring.

634

### 635 **Interactions between *unc-5* and other genes affect a probability distribution for the** 636 **direction of extension**

637 We hypothesize that there are interactions between *unc-5* and other genes that control the  
638 degree to which the direction of outgrowth fluctuates. Probability distributions for the  
639 direction of extension are used to study how genes affect the fluctuation of outgrowth activity.  
640 By comparing the distributions created from wild-type and mutant animals, the relative effect  
641 that genes have on the fluctuation can be determined. To accomplish this, the direction that the  
642 HSN axon initially extends from the cell body is scored (Figure 9A).

643

644 Using this assay, we examined genetic interactions between *unc-5* and four other genes; *elg-20*,  
645 *sax-3*, *madd-2*, or *unc-6*. We have chosen these particular genes because previous observations  
646 suggest interactions. 1) EGL-20 (Wnt) is a secreted cue expressed from posterior sources (PAN  
647 *et al.* 2006) and it affects to which surface of the HSN neuron the UNC-40 receptor localizes and  
648 mediates outgrowth (KULKARNI *et al.* 2013). Based on a directional phenotype, a synergistic

649 interaction between *unc-5* and *egl-20* has been observed. In either *unc-5* or *egl-20* mutants the  
650 ventral extension of AVM and PVM axons is only slightly impaired, whereas in the double  
651 mutants there is much greater penetrance (LEVY-STRUMPF AND CULOTTI 2014). 2) SAX-3 (Robo) is  
652 a receptor that regulates axon guidance and is required for the asymmetric localization of UNC-  
653 40 in HSN (TANG AND WADSWORTH 2014). Based on a directional phenotype, SAX-3 and UNC-40  
654 appear to act in parallel to guide the HSN towards the ventral nerve cord (XU *et al.* 2015). 3)  
655 MADD-2 is a cytoplasmic protein of the tripartite motif (TRIM) family that potentiates UNC-40  
656 activity in response to UNC-6 (ALEXANDER *et al.* 2009; ALEXANDER *et al.* 2010; HAO *et al.* 2010;  
657 MORIKAWA *et al.* 2011; SONG *et al.* 2011; WANG *et al.* 2014). MADD-2::GFP and F-actin colocalize  
658 with UNC-40::GFP clusters in the anchor cell (WANG *et al.* 2014). 4) Of course, UNC-6 is an UNC-  
659 5 ligand. DCC (UNC-40) and UNC5 (UNC-5) are thought to act independently or in a complex to  
660 mediate responses to netrin (UNC-6) (COLAVITA AND CULOTTI 1998; HONG *et al.* 1999; MACNEIL *et*  
661 *al.* 2009; LAI WING SUN *et al.* 2011).

662

663 In a test for interaction with *egl-20*, we find that in comparison to *unc-5(e53)* or *egl-20(n585)*  
664 mutants, the *unc-5(e53);egl-20(n585)* double mutant have a lower probability for ventral  
665 outgrowth and higher probability for outgrowth in other directions (Table 1). This suggests  
666 that *unc-5* and *egl-20* may act in parallel to achieve the highest probability for HSN ventral  
667 outgrowth, *i.e.* they act to prevent UNC-40-mediated outgrowth from fluctuating in other  
668 directions.

669

670 In a test for interaction with *sax-3*, we find that the probability of outgrowth in each direction in  
671 *unc-5(e53);sax-3(ky200)* mutants is similar to the probabilities in *sax-3(ky200)* or *sax-3(ky123)*  
672 mutants (Table 1). Given the results with *unc-5* and *egl-20*, we further tested the probability of

673 outgrowth in each direction in *egl-20(n585);sax-3(ky123)* mutants. We find that it is similar to  
674 the probabilities in *sax-3(ky200)* or *sax-3(ky123)* mutants (Table 1). The *sax-3(ky123)* allele  
675 results in a deletion of the signal sequence and first exon of the gene, whereas *sax-3(ky200)*  
676 contains a missense mutation which is thought to cause protein misfolding and mislocalization  
677 at the restrictive temperature (25°C) (ZALLEN *et al.* 1998; WANG *et al.* 2013). The *egl-*  
678 *20(n585);sax-3(ky123)* mutants do not grow well and so it is easier to use the temperature sensitive  
679 *sax-3* allele. Together, the results suggest that *sax-3* may be required for both the *unc-5-* and the  
680 *egl-20*-mediated activities that allow the highest probability for HSN ventral outgrowth.

681  
682 In a test for interaction with *madd-2*, we find that the probability of outgrowth in each direction in  
683 *unc-5(e53);madd-2(tr103)* mutants is similar to the probabilities in *madd-2(tr103)* mutants (Table 1).  
684 There is a higher probability for anterior HSN outgrowth, similar to what is observed in *unc-*  
685 *40(e1430)* mutants. These results suggest that *madd-2* might be required for the *unc-40*  
686 outgrowth activity. The probability of outgrowth in each direction in *madd-2(tr103);sax-*  
687 *3(ky123)* mutants is similar to the probabilities in *sax-3(ky200)* or *sax-3(ky123)* mutants (Table  
688 1). The *madd-2(tr103)* allele appears to act as a genetic null (ALEXANDER *et al.* 2010).

689  
690 In a test for interaction with *unc-6*, we find that the probability of outgrowth in each direction  
691 in *unc-5(e53);unc-6(ev400)* and *unc-40(e1430);unc-5(e53)* mutants is similar to the probabilities  
692 in *unc-6(ev400)* mutants insofar as there is a lower probability for ventral outgrowth and a  
693 higher probability for anterior outgrowth (Table 1). However, the probabilities in each  
694 direction are closer to those obtained from the *unc-40(e1430)* mutants because the probability  
695 of anterior outgrowth is lower in these mutants than in *unc-6* mutants. This suggest that UNC-5  
696 and UNC-40 might help increase the probability of anterior outgrowth in the absence of UNC-6.

697

698 ***unc-5* is a member of a class of genes that has a similar effect on the spatial extent of movement**

699 The results above show that *unc-5* and its interactions with other genes affect the degree to  
700 which the direction of outgrowth fluctuates. The degree of fluctuation differs depending on the  
701 genes involved. A property of random movement is that the more the direction of movement  
702 fluctuates, the shorter the distance of travel is in a given amount of time (Figure 2E). To depict  
703 how *unc-5* and other genes differentially regulate the spatial extent of movement, we use  
704 random walk modeling. Random walks describe movement that occurs as a series of steps in  
705 which the angles and the distances between each step is decided according to some probability  
706 distribution. By using the probability distribution obtained from a mutant for each step of a  
707 random walk, and by keeping the distance of each step equal, a random walk can be  
708 constructed (Figure 9A). In effect, this method applies the probability distribution to discrete  
709 particles having idealized random walk movement on a lattice. By plotting random walks  
710 derived from wild-type animals and different mutants, the relative effect that mutations have  
711 on random walk movement can be visualized. For example, Figure 9B shows 50 tracks of 500  
712 steps for wildtype and two mutants (mutant A is *unc-5(e53)* and mutant B is *egl-20(n585);sax-*  
713 *3(ky123)*). This reveals the effect that a mutation has on the displacement of movement. After  
714 500 steps the displacement from the origin (0,0) is on average less for mutant A than for  
715 wildtype, and less for mutant B than for wildtype or mutant A.

716

717 The random walk models show the relative effect that a mutation has on a property of  
718 outgrowth movement. It is worth noting that this is not modeling the actual trajectory of  
719 migrating axons. As discussed in the introduction, neuronal outgrowth is essentially a mass  
720 transport process in which mass (the molecular species of the membrane) is sustained at the



721 leading edge and moves outward. Our assay compares the effect that different mutations  
722 would have on the movement of mass at the leading edge of an extension if the conditions of the  
723 system were kept constant. Of course, *in vivo* the conditions are not constant. For one, as an  
724 extension moves it will encounter new environments where the cues may be new or at different  
725 concentrations, all of which affect the probability distribution. The actual patterns of  
726 outgrowth observed are the result of all the probabilities for outgrowth that occur at each  
727 instance of time. It has recently been suggested that our description might be more accurately  
728 described as neuro-percolation, a superposition of random-walks (AIELLO 2016).

729

730 Our random walk analysis compares the effect that different mutations have on the properties  
731 of movement. In wild-type animals, there is a high probability for outgrowth in the ventral  
732 direction. The analysis shows that conditions in wildtype create nearly straight-line movement,  
733 *i.e.* if the same random walk is repeatedly done for the same number of steps, starting at the  
734 same origin, the final position of the walk along the x axis does not vary a great amount. In  
735 comparison, we find that a mutation can create random walk movement in which the final  
736 position is more varied. This variation occurs because the mutation increases the probability of  
737 outgrowth in other directions. For each mutation, we simulate 50 random walks of 500 steps  
738 and derive the mean and standard deviation of the final position along the X-axis. To compare  
739 strains, we plot the normal distribution, setting the mean at the same value for each. The  
740 difference between the curve for a mutant and wildtype shows the degree to which the  
741 mutation caused the direction of outgrowth to fluctuate (Figure 9C).

742

743 The results reveal four different distribution patterns (Figure 10). The first class is the wild-  
744 type distribution, which has the distribution curve with the highest peak. The second class

745 comprises *unc-5*, *egl-20*, *unc-53*, and *unc-6* in which the distribution curve is flatter than the  
746 wild-type curve. We included *unc-53* because our previous study showed that it has genetic  
747 interactions with *unc-5* and *unc-6* (KULKARNI *et al.* 2013). The *unc-53* gene encodes a  
748 cytoskeletal regulator related to the mammalian NAV proteins and *unc-53* mutations cause  
749 guidance defects (MAES *et al.* 2002; STRINGHAM *et al.* 2002; STRINGHAM AND SCHMIDT 2009). The  
750 third class has a distribution curve which is flatter than the second and comprises *sax-3*, *mig-15*,  
751 and several double mutation combinations (Figure 10). The fourth class has the flattest  
752 distribution curve and comprises *egl-20;sax-3*, *unc-40;sax-3*, and *unc-53;sax-3;unc-6*. This class  
753 indicates the greatest degree of fluctuation. The ability to cause the direction of movement to  
754 fluctuate is not associated with a specific direction of HSN movement. For example, *unc-5;sax-3*,  
755 *unc-53;unc-6*, *unc-40;egl-20*, and *madd-2;sax-3* each show a widely dispersed pattern, but the  
756 direction is ventral, dorsal, anterior, and posterior, respectively (Figure 10).

757

758 The distribution patterns indicate that genes have different effects on the extent that outgrowth  
759 movement can travel through the environment. Mean squared displacement (MSD) is a  
760 measure of the spatial extent of random motion. The MSD can be calculated from the random  
761 walk data. Plotting MSD as a function of the time interval shows how much an object displaces,  
762 on average, in a given interval of time, squared (Figure 11A). For normal molecular diffusion,  
763 the slope of the MSD curve is directly related to the diffusion coefficient. In cell migration  
764 models this value is referred to as the random motility coefficient. Coefficients are  
765 experimentally determined; they describe how long it takes a particular substance to move  
766 through a particular medium. We determine this value in order to numerically and graphically  
767 compare how mutations can alter displacement relative to wildtype (Figure 11B). The four  
768 classes of genes are apparent by comparing the height of the bars in Figure 11B. Results for the

769 *unc-40* mutation are also show. The random walk pattern is published (TANG AND WADSWORTH  
770 2014).

771

772 The results of this modeling suggest that the activities of certain genes, and combinations of  
773 genes, have distinct effects on the rate of outgrowth movement. In theory, these differences  
774 could be an important means by which genes cause different outgrowth patterns.

775

### 776 **UNC-40 receptor clustering is coupled to the SDAL process**

777 We investigated the relationship between UNC-40::GFP localization and outgrowth movement.  
778 Beginning in the early L2 stage, UNC-40::GFP becomes localized to the ventral side of HSN in  
779 wildtype (ADLER *et al.* 2006; KULKARNI *et al.* 2013). Reflecting the dynamic morphological  
780 changes that occur as the HSN axon forms, the site of asymmetric UNC-40::GFP localization  
781 alternates in the neurites and along the ventral surface of the neuron (KULKARNI *et al.* 2013).  
782 Dynamic UNC-40::GFP localization patterns have also been reported for the anchor cell, in  
783 which UNC-40 and UNC-6 are also key regulators of extension (ZIEL *et al.* 2009; HAGEDORN *et al.*  
784 2013). Live imaging of the anchor cell reveals that UNC-40::GFP “clusters” form, disassemble,  
785 and reform along the membrane (WANG *et al.* 2014). However, live imaging can’t directly  
786 ascertain whether the position of a cluster is randomly determined since a movement event  
787 cannot be repeatedly observed to determine a probability distribution. Mathematical modeling  
788 of cluster movement as a stochastic process has not been done.

789

790 The UNC-40::GFP clustering phenomena raises questions about the relationship between  
791 robust UNC-40 clustering (*i.e.*, sites of distinct UNC-40 localization observable by UNC-40::GFP)

792 and UNC-40-mediated outgrowth activity. Two models are presented in Figure 12. In the first  
793 model, the output of the SDAL process is receptor clustering (Figure 12A). After a cluster  
794 becomes stabilized at a site, the machinery required for outgrowth is recruited and outgrowth  
795 occurs. In our model, the SDAL process and UNC-40-mediated outgrowth activity are coupled  
796 and are part of the same stochastic process that occurs at the micro-scale (Figure 12B). UNC-  
797 40::GFP clustering is a macro-scale event which can be observed. It is a consequence of the  
798 micro-scale events.

799

800 The models make specific predictions that can be tested. In the first model, UNC-40-mediated  
801 outgrowth will not happen if UNC-40 does not cluster. In our model, the loss of UNC-40  
802 clustering does not lead to a loss of UNC-40-mediated outgrowth. In the *sax-3* mutant there is a  
803 large fluctuation in the direction of outgrowth; it is in the third class of mutants (Figures 10 and  
804 11). We previously reported that *sax-3* is required for robust UNC-40::GFP asymmetric  
805 localization; in *sax-3* mutants UNC-40::GFP remains uniformly dispersed around the periphery  
806 of HSN ((TANG AND WADSWORTH 2014) and Figure 13). Whereas in the *sax-3* mutant there is a  
807 ventral bias for outgrowth, in the *unc-40;sax-3* mutant there is not (Figure 10). This suggests  
808 that in the *sax-3* mutant there is UNC-40-mediated outgrowth activity that helps create a  
809 ventral bias. This is consistent with our model because UNC-40-mediated outgrowth activity is  
810 occurring even when robust UNC-40::GFP is not observed.

811

812 We hypothesize that a consequence of the micro-scale SDAL process over time is macro-scale  
813 UNC-40 clustering. If so, then *unc-5* activity should affect UNC-40::GFP clustering because it  
814 affects the degree to which the direction of UNC-40 receptor localization fluctuates. However,  
815 even though there is a higher probability that localization occurs at surfaces other than at the

816 ventral surface, we observe robust asymmetrically localized UNC-40::GFP clustering in *unc-*  
817 *5(e53)* mutants (KULKARNI *et al.* 2013). We speculate that *unc-5(e53)*, as well as other gene  
818 mutations, do not cause the direction of UNC-40 localization to fluctuate enough to prevent  
819 observable UNC-40::GFP clustering. We therefore decided to examine UNC-40::GFP clustering  
820 in double mutants to determine whether the ability to observe UNC-40::GFP clustering is  
821 correlated with the degree of fluctuation.

822

823 We made double mutant combinations between *unc-5*, and *egl-20* or *unc-53*. In *egl-20* and *unc-*  
824 *53* single mutants there is fluctuation in the direction of outgrowth (Figures 10 and 11) and  
825 robust asymmetrical UNC-40::GFP localization (Figure 13, *unc-53* results were previously  
826 reported (KULKARNI *et al.* 2013)). In comparison to the single mutants, the double mutants all  
827 show an increase in the degree to which the direction of outgrowth fluctuates (Figures 10 and  
828 11). Further, in contrast to the single mutants, UNC-40::GFP remains uniformly dispersed  
829 around the periphery of HSN in the double mutants (Figure 13). The results suggest a  
830 correlation between increased fluctuation of UNC-40-mediated outgrowth activity and the  
831 ability to detect UNC-40::GFP clustering. This is consistent with our model (Figure 12B). We  
832 also observe that in *madd-2(tr103)* mutants the direction of outgrowth fluctuates (Table 1), but  
833 unlike *egl-20* and *unc-53* single mutants, there is not robust asymmetrical UNC-40::GFP  
834 localization and UNC-40::GFP remains uniformly dispersed (Figure 13). The double mutants,  
835 *unc-5;madd-2*, are similar to the single *madd-2* mutant. Similar results are observed with *sax-3*  
836 and *unc-5;sax-3* mutants (Figure 13). We hypothesize that in the *madd-2* and *sax-3* mutations  
837 the degree to which the direction of UNC-40 localization fluctuates is so great that the *unc-5*  
838 mutation makes no difference on the UNC-40::GFP clustering phenotype.

839

## 840 Discussion

841 We have proposed a model of neuronal outgrowth movement that is based on statistically  
842 dependent asymmetric localization (SDAL). This model states that the probability of UNC-40  
843 localizing and mediating outgrowth at one site affects the probability of localization and  
844 outgrowth at other sites as well. By regulating this process, genes control the degree to which  
845 the direction of outgrowth fluctuates and, consequently, the outward movement of the plasma  
846 membrane. UNC-5 is a receptor for UNC-6 and can form a complex with UNC-40. UNC-5 is  
847 commonly proposed to direct outgrowth by mediating a repulsive response to UNC-6. In  
848 contrast, our model is not based on the concept of repulsion and it predicts that UNC-5 can  
849 control the rate of outward movement that is directed towards, away from, or perpendicular to  
850 UNC-6 sources. We report that *unc-5* loss-of-function mutations affect the development of  
851 multiple neurites that develop from HSN and extend towards UNC-6 sources. They also  
852 suppress the development of extra HSN processes which are induced by a *mig-15* mutation or  
853 by expression of the N-terminal fragment of UNC-6 and which extend towards UNC-6 sources.  
854 We also observe that *unc-5* mutations suppress the anterior overextension of the PLM axon that  
855 occurs in the *mig-15* mutant. This axon extends perpendicular to UNC-6 sources. Finally, *unc-5*  
856 loss-of-function mutations affect the branching and extension of ALM and AVM axons at the  
857 nerve ring where the sources of UNC-6 are in a more complex arrangement. Below we discuss  
858 how the SDAL model can be used to interpret *unc-5* mutant phenotypes. We argue that in each  
859 case, phenotypes can be explained by the ability of UNC-5 to affect UNC-40 asymmetric  
860 localization, which in turn controls the degree to which the direction of outgrowth activity  
861 fluctuates and the extent of outward movement. Our model also suggests genes that were  
862 previously classified as regulating attraction or repulsion might act with *unc-5* to regulate  
863 neuronal outgrowth by controlling the degree to which the direction of UNC-40-mediated  
864 outgrowth fluctuates. We show that UNC-5 acts together with the cytoplasmic protein UNC-53

865 to regulate UNC-40 asymmetric localization in response to the UNC-6 and EGL-20 extracellular  
866 cues.

867

868 **PLM extension phenotype:** We hypothesize that cue(s) present around the PLM cell body  
869 create a strong bias for anterior outgrowth activity (Figure 14A). These include UNC-6 and  
870 other cues that flank the longitudinal pathway and cause an equal probability of outgrowth in  
871 the dorsal and ventral directions. UNC-40 SDAL activity acts to suppress nonUNC-40 SDAL  
872 activity (Figure 6). As the extension moves towards more anterior positions (Figure 14A,  
873 positions 2 and 3), it encounters higher levels of a cue(s) that promotes outgrowth through  
874 nonUNC-40 receptors. As a result, the probability of nonUNC-40 SDAL activity at the dorsal and  
875 ventral surfaces of the leading edge increases. Because the asymmetric localization of a  
876 receptor is statistically dependent, the probability of nonUNC-40 SDAL activity at the anterior  
877 surface of the leading edge must decrease as the localization elsewhere increases. While this  
878 effect does not necessarily change the anterior bias for outgrowth, it does significantly  
879 increase the degree to which the direction of nonUNC-40 outgrowth activity fluctuates, which  
880 consequently decreases the extent of outward movement (Figure 14C). This effect stalls  
881 forward movement.

882

883 We hypothesize that mutations affect the degree to which the direction of nonUNC-40 outgrowth  
884 activity fluctuates at position 3 (Figure 15). MIG-15 appears to promote nonUNC-40 SDAL activity,  
885 whereas UNC-5 promotes UNC-40 SDAL activity. Because each activity can suppress the other, different  
886 domains of nonUNC-40 and UNC-40 SDAL activity can be established along the surface of the leading  
887 edge. As the extension moves towards position 3, there is higher nonUNC-40 activity at the more  
888 anterior surface and higher UNC-40 activity at the dorsal and ventral surfaces. By suppressing nonUNC-  
889 40 activity, the *mig-15* mutation increases, relative to wildtype, the UNC-40 activity at the dorsal and

890 ventral surfaces at position 3. This UNC-40 activity decreases the probability of nonUNC-40 activity at  
891 these surfaces and increases the probability of nonUNC-40 activity at the anterior surface. By reducing  
892 the degree to which nonUNC-40 outgrowth fluctuates, a greater anterior directional bias is created in  
893 the *mig-15* mutants. This results in overextension. The *unc-5* mutation represses the UNC-40 activity at  
894 the dorsal and ventral surfaces, increasing the degree to which the direction of the nonUNC-40  
895 outgrowth activity fluctuates. This suppresses the overextension cause by the *mig-15* mutation.

896

897 **AVM nerve ring branching and extension phenotype:** Similar to what is proposed for PLM at  
898 position 3 in Figure 14, all the surfaces of the leading edge of AVM become exposed to high  
899 levels of a cue(s) (Figure 16A, position 1). The degree to which the direction of outgrowth  
900 activity fluctuates greatly increases and outward movement stalls. For AVM, this occurs at the  
901 nerve ring, which is a source of UNC-6. However, for AVM there are cues at the nerve ring  
902 which are arranged perpendicular to one another. We propose that the high level of UNC-6 at  
903 all surfaces allows UNC-40 SDAL activity to become more uniformly distributed along all  
904 surfaces of the leading edge (Figure 16B) and creates a state where the probabilities of outgrowth  
905 in every direction become equal. Both anterior and dorsal outward movement stalls (Figure 16C).  
906 This state allows any new cues encountered to effectively create a directional bias (Figure 4). UNC-6  
907 and other cues are arranged along the nerve ring, whereas nonUNC-6 cues are arranged  
908 anterior of the nerve ring. As some outgrowth ventures anteriorly and dorsally, these cues  
909 stimulate the development of nonUNC-40 and UNC-40 SDAL activity domains (Figure 16B,  
910 position 2). Even slight outward movement in the anterior or dorsal directions may reinforce  
911 movement in that direction if cues arranged along the axis perpendicular to the direction bias  
912 suppress the UNC-40 or nonUNC-40 SDAL activity along the surfaces perpendicular to the  
913 directional bias (as depicted in Figure 14B, position 1).

914



915 We hypothesize that mutations affect the degree to which the direction of UNC-40 and nonUNC-40  
916 outgrowth activity fluctuates at position 2 (Figure 17). In *unc-40* mutants, the lack of dorsal UNC-40  
917 activity allows the direction of nonUNC-40 outgrowth to fluctuate more. However, the anterior cues  
918 increase the probability of anteriorly directed nonUNC-40 outgrowth and, thereby, decrease the  
919 probability of dorsally directed activity. This suppresses dorsal extension, while still allowing anterior  
920 extension. Loss of MIG-15 activity in the *unc-40* mutant background suppresses the nonUNC-40 SDAL.  
921 In comparison to the single *unc-40* mutant, in *unc-40;mig-15* mutants the probability of anterior  
922 outgrowth in response to the anterior cues is lower. Consequently, the probability of dorsal nonUNC-40  
923 outgrowth is higher. We speculate that this allows some dorsal extension. In *unc-5* mutants, UNC-40  
924 SDAL activity is reduced, but the activity is still sufficient to allow dorsal extension. Loss of both UNC-5  
925 and MIG-15 function most severely hampers the ability to direct the receptors specifically to one  
926 surface. The *unc-5;mig-15* mutants have the most abnormal outgrowth patterns.

927

928 **HSN extension phenotypes:** We hypothesize that there is high probability for ventrally  
929 directed outgrowth from the HSN cell body because of the strong outgrowth-promoting effect  
930 of the UNC-40-mediated response to the UNC-6 cue, which is in a higher concentration ventral  
931 of the cell body (Figure 18A). We hypothesize that the same process takes place in the HSN  
932 neuron as in the PLM neuron, except the movement is towards the UNC-6 source. We depict in  
933 Figure 8B that at position 1 there is some nonUNC-40 SDAL activity at the ventral surface of the  
934 leading edge. By position 2, higher levels of UNC-6 increase UNC-40 SDAL and suppress ventral  
935 nonUNC-40 SDAL activity. At position 3, UNC-6 is present at high levels along all surfaces and  
936 the direction of UNC-40 outgrowth greatly fluctuates. Possibly, the degree to which the  
937 direction of UNC-40 and nonUNC-40 outgrowth activity fluctuates is greater at position 1, than  
938 at position 2 (Figure 18C). However, at position 3 the fluctuation is greatest.

939

940 We hypothesize that the interplay between UNC-40 and nonUNC-40 SDAL activity allows  
941 multiple extensions to develop in the same direction. In fact, UNC-40, UNC-5, MIG-15, and  
942 UNC-6 (netrin) activities may function as a type of reaction-diffusion system (TURING 1952; GIERER  
943 AND MEINHARDT 1972; MEINHARDT AND GIERER 2000; KONDO AND MIURA 2010; GOEHRING AND  
944 GRILL 2013). Along the ventral surface there is a competition between UNC-40 receptors to direct  
945 further UNC-40 localization to that site and to inhibit flanking receptors from doing the same.  
946 Overtime, the SDAL activity that began at one site predominates, leading to an area of higher  
947 outgrowth activity (Figure 19). We speculate that by helping to suppress UNC-40 SDAL activity,  
948 nonUNC-40 activity increases the threshold by which the SDAL activity at one site can begin to  
949 predominate. The *mig-15* mutation suppresses the nonUNC-40 SDAL activity and decreases the  
950 threshold. This may allow more sites along the membrane where UNC-40 SDAL activity can  
951 predominate. The sites do not overlap because of the long-range negative feedback that inhibits  
952 neighboring UNC-40 activity. The *unc-5* mutation suppresses UNC-40 SDAL activity, both the  
953 positive and negative feedback loops. This retards the ability to enhance and localize the process to  
954 one area of the surface. This causes greater fluctuation in the direction of outgrowth activity across  
955 the entire ventral surface of the neuron. As a result, the rate of initial outgrowth is even less than that  
956 which occurs in wildtype and the area of outward growth is more broad.

957

### 958 **A genetic pathway for UNC-40 asymmetric localization**

959 We present a genetic pathway for the asymmetrical localization of UNC-40 based on the phenotype  
960 of robust UNC-40::GFP clustering in HSN. A full understanding of the molecular mechanisms  
961 underlying the SDAL process is an important long-term goal. Since we believe that UNC-  
962 40::GFP clustering is a readout of that process, constructing genetic pathways for the clustering  
963 of UNC-40::GFP is a step toward this goal. We wish to know how UNC-5 mediates signaling  
964 within HSN that controls the UNC-40 asymmetric localization process. However, a role for

965 UNC-5 in HSN is paradoxical given the widespread idea that UNC-5 mediates a repulsive  
966 response to UNC-6 and that HSN outgrowth is towards the source of UNC-6. All the same, we  
967 suggest a cell-autonomous role for UNC-5 in HSN is the most parsimonious model. First, UNC-5  
968 is an UNC-6 receptor that can mediate neuronal responses when in complex with UNC-40  
969 (HONG *et al.* 1999; GEISBRECHT *et al.* 2003; KRUGER *et al.* 2004; FINCI *et al.* 2014). We previously  
970 showed that UNC-40 conformational changes regulate HSN asymmetric localization in HSN (XU  
971 *et al.* 2009) and we now show that UNC-5 regulates UNC-40 asymmetric localization in HSN. It  
972 is therefore plausible that UNC-5 affects UNC-40 conformational changes that regulate UNC-40  
973 asymmetric localization. Second, UNC-5 can alter the number to HSN outgrowths in response  
974 to UNC-6 and to the UNC-6 $\Delta$ C ligand. Directional guidance by UNC-6 and UNC-6 $\Delta$ C is generally  
975 normal in an *unc-5* mutant, suggesting that the ability of UNC-5 to regulate the number of  
976 outgrowths is not due to an alteration in the extracellular distribution of its UNC-6 ligand.  
977 Further, the UNC-6 $\Delta$ C ligand and the *mig-15* mutation create the same outgrowth phenotype,  
978 which can be suppressed by loss of UNC-5 function, and we have shown that MIG-15 acts cell  
979 autonomously in HSN to regulate UNC-40 asymmetric localization (YANG *et al.* 2014). Further,  
980 we have shown that the UNC-5-mediated response that regulates UNC-40 asymmetric  
981 localization also depends on UNC-53 (NAV2) (KULKARNI *et al.* 2013), a cytoplasmic protein that  
982 functions cell-autonomously for cell migration and axon guidance (STRINGHAM *et al.* 2002).  
983 Together, these observations strongly suggest that UNC-5 directly regulates signaling within  
984 HSN. Third, a role for UNC-5 in the guidance of AVM and PVM axons towards UNC-6 sources  
985 has also been suggested. A synergistic interaction between *unc-5* and *egl-20* is observed; in  
986 either *unc-5* or *egl-20* mutants the ventral extension of AVM and PVM axons is only slightly  
987 impaired, whereas in the double mutants there is a much greater penetrance (LEVY-STRUMPF AND  
988 CULOTTI 2014). The expression of an *unc-5* transgene in AVM and PVM can rescue the AVM and  
989 PVM axon guidance defects of the *unc-5;egl-20* double mutant (LEVY-STRUMPF AND CULOTTI 2014).

990 We note that for HSN, transgenic rescue using *unc-5* constructs have not been successful and in  
991 wild-type animals UNC-5 expression in HSN has not been reported. As well, expression has not  
992 been reported in AVM, PVM, and PLM wild-type neurons. We suspect there may be technical  
993 difficulties or that UNC-5 expression might be low in these cells. UNC-5 is detected in PLM in  
994 *rpm-1* mutants, which is consistent with evidence that UNC-5 activity is required for PLM  
995 overextension in these mutants (Li *et al.* 2008).

996

997 To construct genetic pathways, we use the readout of whether UNC-40::GFP is clearly and  
998 consistently localized to any side of the HSN neuron in different mutants (Figure 13). A  
999 summary of the results is presented (Figure 20A). UNC-6 is required for robust asymmetric  
1000 UNC-40 localization; in the absence of UNC-6 function UNC-40 remains uniformly distributed  
1001 along the surface of the plasma membrane. The loss of both UNC-53 and UNC-5 function also  
1002 results in a uniform distribution, however loss of either one alone does not. This suggests that  
1003 UNC-53 and UNC-5 pathways act redundantly downstream of UNC-6 (Figure 20B). Moreover,  
1004 we observe there is robust asymmetric UNC-40 localization when there is a loss of UNC-6  
1005 activity in addition to the loss of UNC-53 and UNC-5. This suggests a third pathway that is  
1006 suppressed by UNC-6 when UNC-53 and UNC-5 activity are missing. Loss of both UNC-5 and  
1007 UNC-6 does not allow UNC-40 localization, whereas loss of both UNC-53 and UNC-6 does,  
1008 therefore UNC-53, rather than UNC-5, acts with UNC-6 to suppress the third pathway.

1009

1010 UNC-40 becomes localized when EGL-20 activity is lost. As well, UNC-40 becomes localized  
1011 when both EGL-20 and UNC-53 activities are lost. This is consistent with UNC-6 promoting  
1012 UNC-40 localization via the UNC-5 pathway. Loss of EGL-20 and UNC-5 prevents UNC-40  
1013 localization. In these animals, the UNC-5 pathway is absent and UNC-6 is present to block the

1014 third pathway, therefore the UNC-53 pathway that leads to UNC-40 localization must require  
1015 EGL-20, as well as UNC-6.

1016

1017 Loss of UNC-6 activity or loss of both UNC-6 and EGL-20 activity prevents localization, whereas  
1018 loss of only EGL-20 does not. To explain this, we propose that when UNC-6 is lost, the third  
1019 pathway, which would otherwise be activated by the loss of UNC-6, remains suppressed  
1020 because EGL-20 activity promotes suppression via UNC-53 activity. This suppression also  
1021 explains why loss of UNC-6 and UNC-5 activity does not cause localization.

1022

1023 The genetic pathways are consistent with the models proposed in Figures 1 and 6. In the  
1024 models, positive feedback loops amplify the polarized responses to extracellular cues, whereas  
1025 negative feedback limits the responses and confines the positive feedback to the sites of  
1026 interaction. We hypothesize that the UNC-5 and UNC-53 genetic pathways shown at the top  
1027 and bottom of Figure 20B correspond to the positive feedback loops depicted in Figures 1 and 6  
1028 by the arrows. The “?” genetic pathway corresponds to UNC-40 asymmetric localization and  
1029 outgrowth activity in the absence of UNC-6. The UNC-53 genetic pathways in Figure 20B that  
1030 block the “?” pathway corresponds to the negative feedback loops (lines) in Figures 1 and 6  
1031 which prevent UNC-40 asymmetric localization and outgrowth in the absence of UNC-6. Loss of  
1032 both UNC-6 and EGL-20 prevents robust asymmetric UNC-40 localization because both UNC-6-  
1033 and EGL-20-mediated positive feedback loops are disrupted. A positive feedback loop may be  
1034 necessary to establish a negative feedback loop. Therefore, the “?” pathway is not active when  
1035 both UNC-6 and EGL-20 are absent.

1036

1037 Importantly, this genetic analysis indicates that netrin (UNC-6) and wnt (EGL-20) signaling are  
1038 integrated to regulate self-organizing UNC-40 asymmetric localization. An implication of this  
1039 result is that the extracellular concentrations of UNC-6 and EGL-20 could control the activation  
1040 or inhibition of UNC-40-mediated outgrowth. This could be important for generating patterns  
1041 of outgrowth when neurons move to new locations within the animal. The picture is  
1042 complicated by the evidence that both UNC-6 and EGL-20 affect the SDAL of both UNC-40-  
1043 mediated and nonUNC-40-mediated outgrowth activity. It is possible that overlapping sets of  
1044 extracellular cues and their receptors are involved in setting the probability of outgrowth for  
1045 each activity. SAX-3 and MADD-2 are required for UNC-40::GFP localization, but also affect  
1046 nonUNC-40-mediated outgrowth. The *egl-20;sax-3* and *unc-40;sax-3* double mutations have the  
1047 greatest effect on restricting the extent of outgrowth movement in any direction (Figures 6 and  
1048 7). Moreover, the number of HSN neurites is reduced in *unc-5* mutants, whereas the number in  
1049 *unc-5;sax-3* double mutants appears normal (Figure 7B). Understanding the interdependence  
1050 of these outgrowth activities could provide a better understanding of how extracellular cues  
1051 affect the patterns of outgrowth *in vivo*.

1052

1053

1054 **Acknowledgments**

1055 We thank Caenorhabditis Genetics Center, J. Culotti, and C. Bargmann for strains; we thank  
1056 Martha Soto and members of the Soto laboratory for support and helpful discussions; we thank  
1057 Martha Soto, Peter Yurchenco, Bhumi Patel and Leely Rezvani for comments on the manuscript.  
1058 We also thank the editors and reviewers of the journal for their insightful comments and  
1059 suggestions. This work was supported by grants NS033156 and NS061805 from the National  
1060 Institutes of Health, National Institute of Neurological Disorders and Stroke and grant 07-3060-  
1061 SCR-E-0 from the New Jersey Commission on Spinal Cord to WGW. This work was also  
1062 supported by grant DFHS13PPCO28 from the New Jersey Commission on Cancer Research to  
1063 AM.

1064 Table

1065

1066

Table 1. Direction of Axon Formation from the HSN Cell Body

|                                                | direction of axon protrusion |         |          |           |            | <i>n</i> | reference                     |
|------------------------------------------------|------------------------------|---------|----------|-----------|------------|----------|-------------------------------|
|                                                | dorsal                       | ventral | anterior | posterior | multipolar |          |                               |
|                                                | %                            | %       | %        | %         | %          |          |                               |
| wildtype                                       | 0                            | 96±2    | 3±2      | 0         | 1±1        | 221      | (KULKARNI <i>et al.</i> 2013) |
| <i>unc-6(ev400)</i>                            | 2±2                          | 3±2     | 81±2     | 8±2       | 6±1        | 218      | (KULKARNI <i>et al.</i> 2013) |
| <i>unc-40(e1430)</i>                           | 2±1                          | 6±2     | 67±2     | 19±1      | 6±1        | 183      | (KULKARNI <i>et al.</i> 2013) |
| <i>unc-5(e53)</i>                              | 0                            | 75±3    | 19±2     | 1±1       | 5±1        | 245      | (YANG <i>et al.</i> 2014)     |
| <i>unc-53(n152)</i>                            | 0                            | 67±3    | 22±2     | 5±1       | 6±1        | 238      | (KULKARNI <i>et al.</i> 2013) |
| <i>sax-3(ky123)</i>                            | 2±1                          | 31±1    | 21±1     | 37±2      | 9±2        | 232      | (TANG AND WADSWORTH 2014)     |
| <i>sax-3(ky200)*</i>                           | 2±1                          | 32±1    | 19±2     | 42±3      | 5±2        | 198      | (TANG AND WADSWORTH 2014)     |
| <i>unc-5(e53);sax-3(ky200)</i>                 | 2±1                          | 40±3    | 24±2     | 28±2      | 6±1        | 120      |                               |
| <i>unc-5(e53);unc-6(ev400)</i>                 | 4±2                          | 5±3     | 59±4     | 22±4      | 9±1        | 201      |                               |
| <i>unc-5(e53);egl-20(n585)</i>                 | 3±1                          | 28±4    | 22±4     | 35±5      | 11±2       | 114      |                               |
| <i>unc-53(n152);unc-5(e53)</i>                 | 0                            | 19±1    | 62±2     | 17±1      | 3±1        | 224      | (KULKARNI <i>et al.</i> 2013) |
| <i>unc-53(n152);unc-6(ev400)</i>               | 24±2                         | 0       | 19±2     | 22±2      | 34±3       | 144      | (KULKARNI <i>et al.</i> 2013) |
| <i>unc-53(n152);sax-3(ky123)</i>               | 1±1                          | 47±3    | 24±2     | 23±5      | 6±3        | 207      | (TANG AND WADSWORTH 2014)     |
| <i>unc-40(e1430);unc-5(e53)</i>                | 5±1                          | 6±1     | 55±2     | 19±2      | 14±1       | 196      | (KULKARNI <i>et al.</i> 2013) |
| <i>unc-40(e1430);sax-3(ky200)*</i>             | 14±3                         | 2±1     | 40±2     | 35±3      | 9±4        | 191      | (TANG AND WADSWORTH 2014)     |
| <i>sax-3(ky200)*; unc-6(ev400)</i>             | 8±1                          | 8±2     | 49±3     | 20±5      | 14±2       | 211      | (TANG AND WADSWORTH 2014)     |
| <i>unc-53(n152);unc-5(e53);unc-6(ev400)</i>    | 23±2                         | 0       | 34±2     | 15±2      | 28±2       | 148      | (KULKARNI <i>et al.</i> 2013) |
| <i>unc-53(n152);sax-3(ky200)*;unc-6(ev400)</i> | 11±2                         | 2±1     | 33±4     | 30±3      | 25±5       | 189      |                               |
| <i>egl-20(n585)</i>                            | 0                            | 64±2    | 21±2     | 7±1       | 8±1        | 304      | (TANG AND WADSWORTH 2014)     |
| <i>egl-20(n585); unc-6(ev400)</i>              | 18±2                         | 0       | 43±2     | 15±2      | 24±2       | 205      | (TANG AND WADSWORTH 2014)     |



|                                   |     |      |      |      |      |     |                           |
|-----------------------------------|-----|------|------|------|------|-----|---------------------------|
| <i>unc-40(e1430);egl-20(n585)</i> | 6±2 | 17±2 | 45±5 | 15±2 | 16±2 | 173 | (TANG AND WADSWORTH 2014) |
| <i>egl-20(n585);sax-3(ky123)</i>  | 1±1 | 12±2 | 39±2 | 39±1 | 8±3  | 177 | (TANG AND WADSWORTH 2014) |
| <i>madd-2(tr103)</i>              | 0   | 19±2 | 55±5 | 17±4 | 8±2  | 179 |                           |
| <i>madd-2(ky592)</i>              | 0   | 52±2 | 43±2 | 5±1  | 0    | 95  |                           |
| <i>unc-5(e53);madd-2(tr103)</i>   | 3±1 | 15±2 | 52±4 | 17±4 | 13±1 | 197 |                           |
| <i>madd-2(tr103);sax-3(ky123)</i> | 2   | 24±3 | 19±4 | 47±1 | 7±2  | 171 |                           |
| <i>unc-53(n152);madd-2(tr103)</i> | 1±1 | 15±2 | 43±2 | 17±1 | 24±4 | 148 |                           |
| <i>mig-15(rh326)</i>              | 2±1 | 15±1 | 24±3 | 11±3 | 48±8 | 131 | (YANG <i>et al.</i> 2014) |

---

Numbers represent percentage value ± SEM.

\*Animals grown at the *sax-3(ky200)* restrictive temperature (25°C).

---

1068 **References**

- 1069 Adler, C. E., R. D. Fetter and C. I. Bargmann, 2006 UNC-6/Netrin induces neuronal asymmetry and defines  
1070 the site of axon formation. *Nat Neurosci* 9: 511-518.
- 1071 Aiello, G. L., 2016 Neuro-Percolation as a Superposition of Random-Walks, pp. in *European Symposium on*  
1072 *Artificial Neural Networks, Computational Intelligence and Machine Learning*. i6doc.com Bruges, Belgium.
- 1073 Alexander, M., K. K. Chan, A. B. Byrne, G. Selman, T. Lee *et al.*, 2009 An UNC-40 pathway directs  
1074 postsynaptic membrane extension in *Caenorhabditis elegans*. *Development* 136: 911-922.
- 1075 Alexander, M., G. Selman, A. Seetharaman, K. K. Chan, S. A. D'Souza *et al.*, 2010 MADD-2, a homolog of  
1076 the Opitz syndrome protein MID1, regulates guidance to the midline through UNC-40 in *Caenorhabditis*  
1077 *elegans*. *Developmental Cell* 18: 961-972.
- 1078 Arriemerlou, C., and T. Meyer, 2005 A local coupling model and compass parameter for eukaryotic  
1079 chemotaxis. *Dev Cell* 8: 215-227.
- 1080 Asakura, T., K. Ogura and Y. Goshima, 2007 UNC-6 expression by the vulval precursor cells of  
1081 *Caenorhabditis elegans* is required for the complex axon guidance of the HSN neurons. *Dev Biol* 304: 800-  
1082 810.
- 1083 Baier, H., and F. Bonhoeffer, 1992 Axon guidance by gradients of a target-derived component. *Science* 255:  
1084 472-475.
- 1085 Bourne, H. R., and O. Weiner, 2002 A chemical compass. *Nature* 419: 21.
- 1086 Buettner, H. M., R. N. Pittman and J. K. Ivins, 1994 A model of neurite extension across regions of  
1087 nonpermissive substrate: simulations based on experimental measurement of growth cone motility and  
1088 filopodial dynamics. *Dev Biol* 163: 407-422.
- 1089 Chan, S. S., H. Zheng, M. W. Su, R. Wilk, M. T. Killeen *et al.*, 1996 UNC-40, a *C. elegans* homolog of DCC  
1090 (Deleted in Colorectal Cancer), is required in motile cells responding to UNC-6 netrin cues. *Cell* 87: 187-195.
- 1091 Chang, C., C. E. Adler, M. Krause, S. G. Clark, F. B. Gertler *et al.*, 2006 MIG-10/Lamellipodin and AGE-  
1092 1/PI3K Promote Axon Guidance and Outgrowth in Response to Slit and Netrin. *Curr Biol* 16: 854-862.
- 1093 Chapman, J. O., H. Li and E. A. Lundquist, 2008 The MIG-15 NIK kinase acts cell-autonomously in  
1094 neuroblast polarization and migration in *C. elegans*. *Dev Biol* 324: 245-257.

- 1095 Colavita, A., and J. G. Culotti, 1998 Suppressors of ectopic UNC-5 growth cone steering identify eight genes  
1096 involved in axon guidance in *Caenorhabditis elegans*. *Dev Biol* 194: 72-85.
- 1097 Finci, L. I., N. Krüger, X. Sun, J. Zhang, M. Chegkazi *et al.*, 2014 The crystal structure of netrin-1 in complex  
1098 with DCC reveals the bifunctionality of netrin-1 as a guidance cue. *Neuron* 83: 839-849.
- 1099 Fraser, A. G., R. S. Kamath, P. Zipperlen, M. Martinez-Campos, M. Sohrmann *et al.*, 2000 Functional  
1100 genomic analysis of *C. elegans* chromosome I by systematic RNA interference. *Nature* 408: 325-330.
- 1101 Geisbrecht, B. V., K. A. Dowd, R. W. Barfield, P. A. Longo and D. J. Leahy, 2003 Netrin binds discrete  
1102 subdomains of DCC and UNC5 and mediates interactions between DCC and heparin. *J Biol Chem* 278:  
1103 32561-32568.
- 1104 Gierer, A., and H. Meinhardt, 1972 A theory of biological pattern formation. *Kybernetik* 12: 30-39.
- 1105 Goehring, N. W., and S. W. Grill, 2013 Cell polarity: mechanochemical patterning. *Trends Cell Biol* 23: 72-  
1106 80.
- 1107 Gopal, A. A., B. Rappaz, V. Rouger, I. B. Martyn, P. D. Dahlberg *et al.*, 2016 Netrin-1-Regulated Distribution  
1108 of UNC5B and DCC in Live Cells Revealed by TICCS. *Biophys J* 110: 623-634.
- 1109 Graziano, B. R., and O. D. Weiner, 2014 Self-organization of protrusions and polarity during eukaryotic  
1110 chemotaxis. *Curr Opin Cell Biol* 30: 60-67.
- 1111 Hagedorn, E. J., J. W. Ziel, M. A. Morrissey, L. M. Linden, Z. Wang *et al.*, 2013 The netrin receptor DCC  
1112 focuses invadopodia-driven basement membrane transmigration in vivo. *J Cell Biol* 201: 903-913.
- 1113 Hao, J. C., C. E. Adler, L. Mebane, F. B. Gertler, C. I. Bargmann *et al.*, 2010 The tripartite motif protein  
1114 MADD-2 functions with the receptor UNC-40 (DCC) in Netrin-mediated axon attraction and branching. *Dev*  
1115 *Cell* 18: 950-960.
- 1116 Hao, J. C., T. W. Yu, K. Fujisawa, J. G. Culotti, K. Gengyo-Ando *et al.*, 2001 *C. elegans* Slit Acts in Midline,  
1117 Dorsal-Ventral, and Anterior-Posterior Guidance via the SAX-3/Robo Receptor. *Neuron* 32: 25-38.
- 1118 Harterink, M., D. H. Kim, T. C. Middelkoop, T. D. Doan, A. van Oudenaarden *et al.*, 2011 Neuroblast  
1119 migration along the anteroposterior axis of *C. elegans* is controlled by opposing gradients of Wnts and a  
1120 secreted Frizzled-related protein. *Development* 138: 2915-2924.

- 1121 Hedgecock, E. M., J. G. Culotti and D. H. Hall, 1990 The *unc-5*, *unc-6*, and *unc-40* genes guide  
1122 circumferential migrations of pioneer axons and mesodermal cells on the epidermis in *C. elegans*. *Neuron* 4:  
1123 61-85.
- 1124 Hong, K., L. Hinck, M. Nishiyama, M. M. Poo, M. Tessier-Lavigne *et al.*, 1999 A ligand-gated association  
1125 between cytoplasmic domains of UNC5 and DCC family receptors converts netrin-induced growth cone  
1126 attraction to repulsion. *Cell* 97: 927-941.
- 1127 Katz, M. J., E. B. George and L. J. Gilbert, 1984 Axonal elongation as a stochastic walk. *Cell Motil* 4: 351-  
1128 370.
- 1129 Keleman, K., and B. J. Dickson, 2001 Short- and long-range repulsion by the *Drosophila* Unc5 netrin receptor.  
1130 *Neuron* 32: 605-617.
- 1131 Killeen, M., J. Tong, A. Krizus, R. Steven, I. Scott *et al.*, 2002 UNC-5 function requires phosphorylation of  
1132 cytoplasmic tyrosine 482, but its UNC-40-independent functions also require a region between the ZU-5 and  
1133 death domains. *Dev Biol* 251: 348-366.
- 1134 Kondo, S., and T. Miura, 2010 Reaction-diffusion model as a framework for understanding biological pattern  
1135 formation. *Science* 329: 1616-1620.
- 1136 Kruger, R. P., J. Lee, W. Li and K. L. Guan, 2004 Mapping netrin receptor binding reveals domains of Unc5  
1137 regulating its tyrosine phosphorylation. *J Neurosci* 24: 10826-10834.
- 1138 Kulkarni, G., Z. Xu, A. M. Mohamed, H. Li, X. Tang *et al.*, 2013 Experimental evidence for UNC-6 (netrin)  
1139 axon guidance by stochastic fluctuations of intracellular UNC-40 (DCC) outgrowth activity. *Biol Open* 2:  
1140 1300-1312.
- 1141 Lai Wing Sun, K., J. P. Correia and T. E. Kennedy, 2011 Netrins: versatile extracellular cues with diverse  
1142 functions. *Development* 138: 2153-2169.
- 1143 Leung-Hagesteijn, C., A. M. Spence, B. D. Stern, Y. Zhou, M. W. Su *et al.*, 1992 UNC-5, a transmembrane  
1144 protein with immunoglobulin and thrombospondin type 1 domains, guides cell and pioneer axon migrations in  
1145 *C. elegans*. *Cell* 71: 289-299.
- 1146 Levy-Strumpf, N., and J. G. Culotti, 2014 Netrins and Wnts function redundantly to regulate antero-posterior  
1147 and dorso-ventral guidance in *C. elegans*. *PLoS Genet* 10: e1004381.
- 1148 Li, H., G. Kulkarni and W. G. Wadsworth, 2008 RPM-1, a *Caenorhabditis elegans* protein that functions in  
1149 presynaptic differentiation, negatively regulates axon outgrowth by controlling SAX-3/robo and UNC-  
1150 5/UNC5 activity. *J Neurosci* 28: 3595-3603.

- 1151 Lim, Y. S., S. Mallapur, G. Kao, X. C. Ren and W. G. Wadsworth, 1999 Netrin UNC-6 and the regulation of  
1152 branching and extension of motoneuron axons from the ventral nerve cord of *Caenorhabditis elegans*. *J*  
1153 *Neurosci* 19: 7048-7056.
- 1154 MacNeil, L. T., W. R. Hardy, T. Pawson, J. L. Wrana and J. G. Culotti, 2009 UNC-129 regulates the balance  
1155 between UNC-40 dependent and independent UNC-5 signaling pathways. *Nat Neurosci* 12: 150-155.
- 1156 Maes, T., A. Barcelo and C. Buesa, 2002 Neuron navigator: a human gene family with homology to *unc-53*, a  
1157 cell guidance gene from *Caenorhabditis elegans*. *Genomics* 80: 21-30.
- 1158 Manser, J., C. Roonprapunt and B. Margolis, 1997 *C. elegans* cell migration gene *mig-10* shares similarities  
1159 with a family of SH2 domain proteins and acts cell nonautonomously in excretory canal development. *Dev*  
1160 *Biol* 184: 150-164.
- 1161 Manser, J., and W. B. Wood, 1990 Mutations affecting embryonic cell migrations in *Caenorhabditis elegans*.  
1162 *Dev Genet* 11: 49-64.
- 1163 Maskery, S. M., H. M. Buettner and T. Shinbrot, 2004 Growth cone pathfinding: a competition between  
1164 deterministic and stochastic events. *BMC Neurosci* 5: 22.
- 1165 McShea, M. A., K. L. Schmidt, M. L. Dubuke, C. E. Baldiga, M. E. Sullender *et al.*, 2013 Abelson interactor-1  
1166 (ABI-1) interacts with MRL adaptor protein MIG-10 and is required in guided cell migrations and process  
1167 outgrowth in *C. elegans*. *Dev Biol* 373: 1-13.
- 1168 Meinhardt, H., and A. Gierer, 2000 Pattern formation by local self-activation and lateral inhibition. *Bioessays*  
1169 22: 753-760.
- 1170 Merz, D. C., H. Zheng, M. T. Killeen, A. Krizus and J. G. Culotti, 2001 Multiple signaling mechanisms of the  
1171 *unc-6/netrin* receptors *unc-5* and *unc-40/dcc* in vivo. *Genetics* 158: 1071-1080.
- 1172 Moore, S. W., M. Tessier-Lavigne and T. E. Kennedy, 2007 Netrins and their receptors. *Adv Exp Med Biol*  
1173 621: 17-31.
- 1174 Morikawa, R. K., T. Kanamori, K. Yasunaga and K. Emoto, 2011 Different levels of the Tripartite motif  
1175 protein, Anomalies in sensory axon patterning (*Asap*), regulate distinct axonal projections of *Drosophila*  
1176 sensory neurons. *Proc Natl Acad Sci U S A* 108: 19389-19394.
- 1177 Mortimer, D., T. Fothergill, Z. Pujic, L. J. Richards and G. J. Goodhill, 2008 Growth cone chemotaxis. *Trends*  
1178 *Neurosci* 31: 90-98.

- 1179 Mortimer, D., Z. Pujic, T. Vaughan, A. W. Thompson, J. Feldner *et al.*, 2010 Axon guidance by growth-rate  
1180 modulation. *Proc Natl Acad Sci U S A* 107: 5202-5207.
- 1181 Nguyen, H., P. Dayan and G. J. Goodhill, 2014 The influence of receptor positioning on chemotactic  
1182 information. *J Theor Biol* 360: 95-101.
- 1183 Nguyen, H., P. Dayan and G. J. Goodhill, 2015 How receptor diffusion influences gradient sensing. *Journal of*  
1184 *The Royal Society Interface* 12.
- 1185 Norris, A. D., and E. A. Lundquist, 2011 UNC-6/netrin and its receptors UNC-5 and UNC-40/DCC modulate  
1186 growth cone protrusion in vivo in *C. elegans*. *Development*.
- 1187 Odde, D. J., and H. M. Buettner, 1995 Time series characterization of simulated microtubule dynamics in the  
1188 nerve growth cone. *Ann Biomed Eng* 23: 268-286.
- 1189 Pan, C. L., J. E. Howell, S. G. Clark, M. Hilliard, S. Cordes *et al.*, 2006 Multiple Wnts and frizzled receptors  
1190 regulate anteriorly directed cell and growth cone migrations in *Caenorhabditis elegans*. *Dev Cell* 10: 367-377.
- 1191 Poinat, P., A. De Arcangelis, S. Sookhareea, X. Zhu, E. M. Hedgecock *et al.*, 2002 A conserved interaction  
1192 between beta1 integrin/PAT-3 and Nck-interacting kinase/MIG-15 that mediates commissural axon navigation  
1193 in *C. elegans*. *Curr Biol* 12: 622-631.
- 1194 Quinn, C. C., D. S. Pfeil, E. Chen, E. L. Stovall, M. V. Harden *et al.*, 2006 UNC-6/netrin and SLT-1/slit  
1195 guidance cues orient axon outgrowth mediated by MIG-10/RIAM/lamellipodin. *Curr Biol* 16: 845-853.
- 1196 Quinn, C. C., D. S. Pfeil and W. G. Wadsworth, 2008 CED-10/Rac1 mediates axon guidance by regulating the  
1197 asymmetric distribution of MIG-10/lamellipodin. *Curr Biol* 18: 808-813.
- 1198 Ren, X. C., S. Kim, E. Fox, E. M. Hedgecock and W. G. Wadsworth, 1999 Role of netrin UNC-6 in patterning  
1199 the longitudinal nerves of *Caenorhabditis elegans*. *J Neurobiol* 39: 107-118.
- 1200 Rosoff, W. J., J. S. Urbach, M. A. Esrick, R. G. McAllister, L. J. Richards *et al.*, 2004 A new chemotaxis assay  
1201 shows the extreme sensitivity of axons to molecular gradients. *Nat Neurosci* 7: 678-682.
- 1202 Sawa, H., and H. C. Korswagen, 2013 Wnt signaling in *C. elegans*. *WormBook*: 1-30.
- 1203 Shakir, M. A., J. S. Gill and E. A. Lundquist, 2006 Interactions of UNC-34 Enabled with Rac GTPases and the  
1204 NIK kinase MIG-15 in *Caenorhabditis elegans* axon pathfinding and neuronal migration. *Genetics* 172: 893-  
1205 913.

- 1206 Sloan, T. F., M. A. Qasaimeh, D. Juncker, P. T. Yam and F. Charron, 2015 Integration of shallow gradients of  
1207 Shh and Netrin-1 guides commissural axons. *PLoS Biol* 13: e1002119.
- 1208 Song, S., Q. Ge, J. Wang, H. Chen, S. Tang *et al.*, 2011 TRIM-9 functions in the UNC-6/UNC-40 pathway to  
1209 regulate ventral guidance. *Journal of genetics and genomics = Yi chuan xue bao* 38: 1-11.
- 1210 Stringham, E., N. Pujol, J. Vandekerckhove and T. Bogaert, 2002 unc-53 controls longitudinal migration in *C.*  
1211 *elegans*. *Development* 129: 3367-3379.
- 1212 Stringham, E. G., and K. L. Schmidt, 2009 Navigating the cell: UNC-53 and the navigators, a family of  
1213 cytoskeletal regulators with multiple roles in cell migration, outgrowth and trafficking. *Cell adhesion &*  
1214 *migration* 3: 342-346.
- 1215 Tang, X., and W. G. Wadsworth, 2014 SAX-3 (Robo) and UNC-40 (DCC) Regulate a Directional Bias for  
1216 Axon Guidance in Response to Multiple Extracellular Cues. *PLoS One* 9: e110031.
- 1217 Tessier-Lavigne, M., and C. S. Goodman, 1996 The molecular biology of axon guidance. *Science* 274: 1123-  
1218 1133.
- 1219 Teulière, J., C. Gally, G. Garriga, M. Labouesse and E. Georges-Labouesse, 2011 MIG-15 and ERM-1  
1220 promote growth cone directional migration in parallel to UNC-116 and WVE-1. *Development* 138: 4475-  
1221 4485.
- 1222 Turing, A. M., 1952 *The Chemical Basis of Morphogenesis*.
- 1223 Wadsworth, W. G., H. Bhatt and E. M. Hedgecock, 1996 Neuroglia and pioneer neurons express UNC-6 to  
1224 provide global and local netrin cues for guiding migrations in *C. elegans*. *Neuron* 16: 35-46.
- 1225 Wadsworth, W. G., and E. M. Hedgecock, 1996 Hierarchical guidance cues in the developing nervous system  
1226 of *C. elegans*. *Bioessays* 18: 355-362.
- 1227 Wang, F. S., C. W. Liu, T. J. Diefenbach and D. G. Jay, 2003 Modeling the role of myosin 1c in neuronal  
1228 growth cone turning. *Biophys J* 85: 3319-3328.
- 1229 Wang, Z., Y. Hou, X. Guo, M. van der Voet, M. Boxem *et al.*, 2013 The EBAX-type Cullin-RING E3 ligase  
1230 and Hsp90 guard the protein quality of the SAX-3/Robo receptor in developing neurons. *Neuron* 79: 903-916.
- 1231 Wang, Z., L. M. Linden, K. M. Naegeli, J. W. Ziel, Q. Chi *et al.*, 2014 UNC-6 (netrin) stabilizes oscillatory  
1232 clustering of the UNC-40 (DCC) receptor to orient polarity. *J Cell Biol* 206: 619-633.

- 1233 Whangbo, J., and C. Kenyon, 1999 A Wnt signaling system that specifies two patterns of cell migration in *C.*  
1234 *elegans*. *Molecular cell* 4: 851-858.
- 1235 X, T., and W. WG, 2014 SAX-3 (Robo) and UNC-40 (DCC) Regulate a Directional Bias for Axon Guidance  
1236 in Response to Multiple Extracellular Cues.
- 1237 Xu, Y., H. Taru, Y. Jin and C. C. Quinn, 2015 SYD-1C, UNC-40 (DCC) and SAX-3 (Robo) function  
1238 interdependently to promote axon guidance by regulating the MIG-2 GTPase. *PLoS Genet* 11: e1005185.
- 1239 Xu, Z., H. Li and W. G. Wadsworth, 2009 The roles of multiple UNC-40 (DCC) receptor-mediated signals in  
1240 determining neuronal asymmetry induced by the UNC-6 (netrin) ligand. *Genetics* 183: 941-949.
- 1241 Yang, Y., W. S. Lee, X. Tang and W. G. Wadsworth, 2014 Extracellular Matrix Regulates UNC-6 (Netrin)  
1242 Axon Guidance by Controlling the Direction of Intracellular UNC-40 (DCC) Outgrowth Activity. *PLoS One*  
1243 9: e97258.
- 1244 Yoshimura, S., J. I. Murray, Y. Lu, R. H. Waterston and S. Shaham, 2008 *mls-2* and *vab-3* Control glia  
1245 development, *hlh-17/Olig* expression and glia-dependent neurite extension in *C. elegans*. *Development* 135:  
1246 2263-2275.
- 1247 Zallen, J. A., B. A. Yi and C. I. Bargmann, 1998 The conserved immunoglobulin superfamily member SAX-  
1248 3/Robo directs multiple aspects of axon guidance in *C. elegans*. *Cell* 92: 217-227.
- 1249 Ziel, J. W., E. J. Hagedorn, A. Audhya and D. R. Sherwood, 2009 UNC-6 (netrin) orients the invasive  
1250 membrane of the anchor cell in *C. elegans*. *Nat Cell Biol* 11: 183-189.
- 1251



1252 **Figure 1. Statistically dependent asymmetric localization (SDAL).** At sites along the  
1253 plasma membrane, UNC-40 interacts with the UNC-6 extracellular cue. A self-organizing  
1254 process is triggered that utilizes positive- and negative-feedback loops. Positive feedback  
1255 (green arrows) amplifies the polarized response to an extracellular cue, while negative  
1256 feedback (red lines) limits the response and can confine the positive feedback to the site of  
1257 UNC-40 and UNC-6 interaction. The outcome of an UNC-40 receptor's activity is to either cause  
1258 an UNC-40 receptor to localize and mediate outgrowth at the site of UNC-6 interaction or at a  
1259 different site. Randomness is considered inherent in this process and each localization event is  
1260 mutually exclusive. This statistical dependence means that the probability of UNC-40 localizing  
1261 and mediating outgrowth at the site of UNC-6 interaction affects the probability of UNC-40  
1262 localizing and mediating outgrowth at another site, and vice versa. As time passes, this process  
1263 causes randomly directed outgrowth activity (force) that drives the outward movement of the  
1264 membrane.

1265

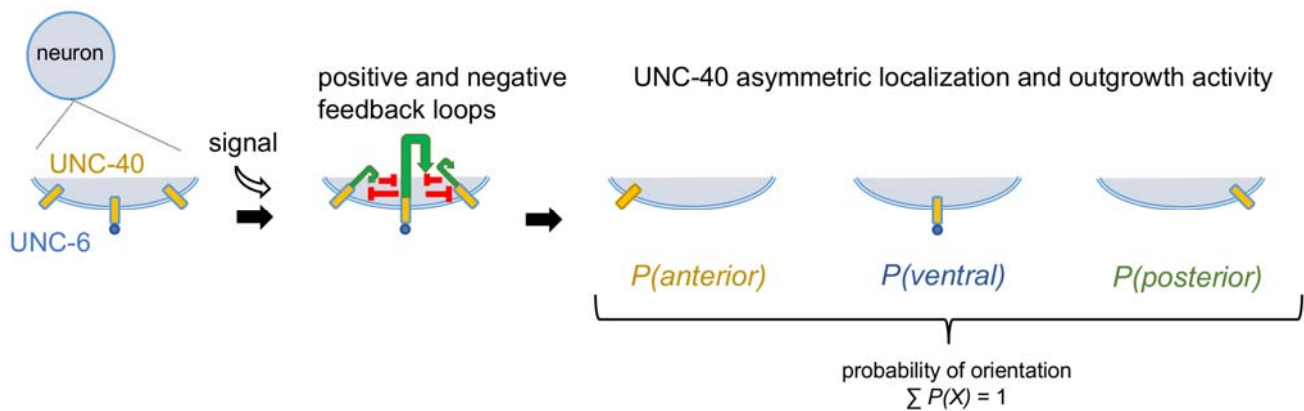

1266

1267

1268

1269 **Figure 2. Model for outgrowth movement. (A)** The outward movement of the neuronal  
1270 membrane is depicted as a mass transport phenomena. The cell membrane is fluid and  
1271 membrane mass will move in different directions as the membrane is subjected to forces  
1272 (arrows) which change its shape. Receptors mediate cellular responses which creates the  
1273 outward force. The force causes movement of the lipids and proteins of the plasma membrane.  
1274 A unit of this mass is shown within a box. Membrane mass is represented by a box in  
1275 subsequent schematic diagrams. **(B)** The mean flow of membrane mass (box) can be described  
1276 as advection and diffusion. The probability density function of the position of mass as a  
1277 function of space and time is described mathematically by an advection-diffusion equation.  
1278 Mass transport by a mean velocity field is advection. Because of the SDAL process and the fluid  
1279 nature of the membrane, mass transport also occurs through random movement, which is  
1280 diffusion. **(C)** During outward movement of the leading edge (times 1-4), membrane molecules  
1281 move in the direction of advection as well as randomly in other directions. **(D)** The path that  
1282 the membrane molecules take during outgrowth can be described as a random walk, which is a  
1283 succession of randomly directed steps. Depicted are the position of mass after each step of a  
1284 succession of four steps as shown in C. Each step corresponds to a time point. **(E)** For two  
1285 examples, 50 simulated random walks of 500 steps were plotted from an origin (0,0). For each  
1286 step the probability of moving to the right, left, or down is given below the plots. The plots  
1287 illustrate that increasing the degree to which the direction of movement fluctuates, decreases  
1288 the outward distance that mass can travel. We predict that the SDAL process influences the  
1289 degree of random membrane movement and, consequently, the outward displacement of the  
1290 membrane.

1291

1292

1293

A. membrane outgrowth

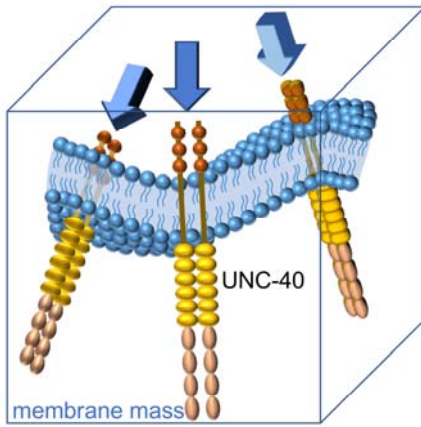

B. mass transport

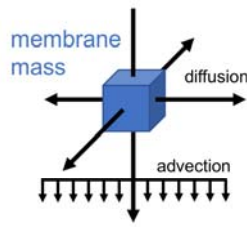

C. axon extension

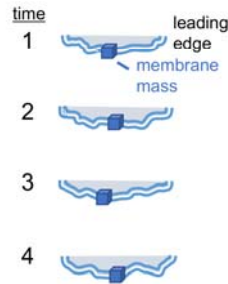

D. random walk

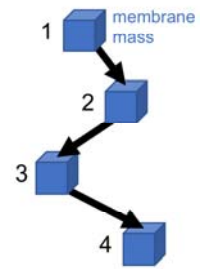

E. mass displacement

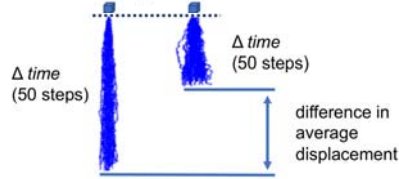

|            |   |     |      |
|------------|---|-----|------|
| $P(right)$ | = | 0.1 | 0.33 |
| $P(left)$  | = | 0.1 | 0.33 |
| $P(down)$  | = | 0.8 | 0.33 |

1294

1295

1296

1297

1298

1299

1300 **Figure 3. Model for outgrowth movement towards extracellular cues that promote or**  
1301 **inhibit outgrowth activity. (A)** Schematic diagram of the outgrowth of a neuron through an  
1302 environment of multiple extracellular cues. These cues may be molecules present at the  
1303 surfaces of surrounding cells and extracellular matrix, or they may be physical interactions that  
1304 influence outgrowth activity. The extracellular cues are represented as color gradients of blue,  
1305 orange, and red. The neuron's response to cues arranged along the anterior/posterior axis  
1306 (orange and red), create an equal probability for UNC-40 asymmetric localization and  
1307 outgrowth in the anterior and posterior directions. The extension transverses three different  
1308 positions (1-3) as it develops towards a ventral source of a cue (blue). **(B)** The SDAL process is  
1309 illustrated as in Figure 1 for the three positions shown in A. Shown are scenarios for  
1310 movement towards a cue (A, blue) that promotes outgrowth (blue +) or that inhibits outgrowth  
1311 (blue -). At positions 1 and 2 cues along the anterior/posterior axis (orange - and red -)  
1312 prevent outgrowth in the anterior or posterior directions. At position 3, the cue from the  
1313 ventral source predominates. **(C)** Random walk modeling as described in Figure 2E. At each  
1314 position (A, 1-3), cues alter the probability distribution for the direction of localization and  
1315 outgrowth. Below each plot is the probability distribution used to create the random walk (see  
1316 Materials and Methods). Probability distributions were selected to represent how different  
1317 levels of the ventral cue might change the probability distribution at each position. The plots  
1318 illustrate the probability density function of the position of mass as a function of space and time  
1319 if movement occurred according to that probability distribution. For both scenarios, an equal  
1320 probability of anterior and posterior outgrowth can allow a ventral directional bias at position  
1321 1. Movement towards a promoting cue source can allow a greater probability for ventral  
1322 outgrowth and, correspondingly, a lower probability for anterior and posterior outgrowth  
1323 (position 2). Movement towards an inhibiting cue source can allow a lower probability for  
1324 ventral outgrowth and, correspondingly, a greater probability for anterior and posterior

1325 outgrowth (position 2'). The ventral direction bias is maintained. In either scenario, an equal  
 1326 probability for outgrowth in all directions may occur as the receptors become saturated  
 1327 because of the high level of the cue from the ventral source (position 3). The modeling predicts  
 1328 that in both scenarios changing levels of the ventral cue will not alter the direction of outward  
 1329 movement, although it may alter the outward displacement of the membrane's mass. See text  
 1330 for details.

1331

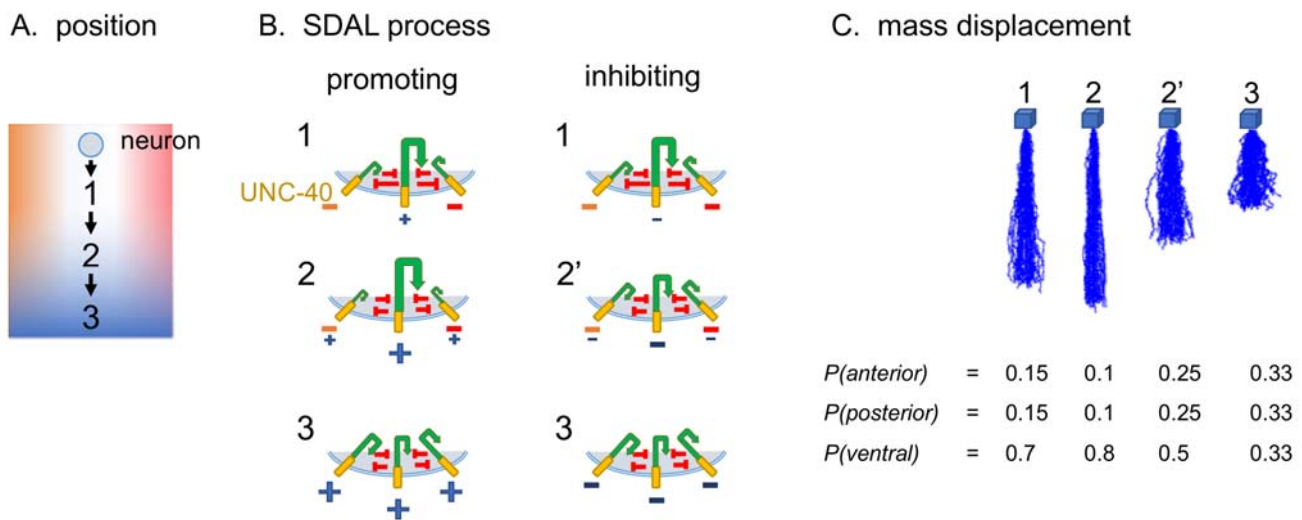

1332

1333

1334

1335

1336

1337

1338

1339

1340

1341

1342

1343 **Figure 4. Model for outgrowth movement that changes direction. (A)** Schematic diagram of the  
1344 outgrowth of a neuron through an environment of multiple extracellular cues as described in Figure 3A.  
1345 Positions 1'-3' represent the position after a change from ventral to anterior outgrowth. **(B)** At each  
1346 position (A, 1-3), the probability distribution for the direction of localization and outgrowth is given as  
1347 in Figure 3C. In order for the direction of outgrowth to shift anteriorly at each position, the probability  
1348 distribution must shift to create a bias for anteriorly directed outgrowth. This is depicted by the  
1349 probability distribution of 0.4 anterior, 0.3 dorsal, and 0.3 ventral for positions 1'-3'. Numbers in red  
1350 indicate the degree to which the probabilities must change between the positions. The model predicts  
1351 that as the system trends towards a state where the probabilities of outgrowth in different directions  
1352 become equal, cues that could shift the direction bias become more effectual.

1353

### A. position

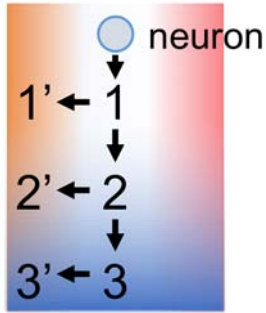

### B. mass displacement

1' ← 1

$$P(\text{anterior}) = 0.4 \quad +0.25 \quad 0.15 = P(\text{anterior})$$

$$P(\text{dorsal}) = 0.3 \quad +0.15 \quad 0.15 = P(\text{posterior})$$

$$P(\text{ventral}) = 0.3 \quad -0.4 \quad 0.7 = P(\text{ventral})$$

2' ← 2

$$P(\text{anterior}) = 0.4 \quad +0.3 \quad 0.1 = P(\text{anterior})$$

$$P(\text{dorsal}) = 0.3 \quad +0.2 \quad 0.1 = P(\text{posterior})$$

$$P(\text{ventral}) = 0.3 \quad -0.5 \quad 0.8 = P(\text{ventral})$$

3' ← 3

$$P(\text{anterior}) = 0.4 \quad +0.07 \quad 0.33 = P(\text{anterior})$$

$$P(\text{dorsal}) = 0.3 \quad 0.00 \quad 0.33 = P(\text{posterior})$$

$$P(\text{ventral}) = 0.3 \quad -0.03 \quad 0.33 = P(\text{ventral})$$

1354

1355

1356 **Figure 5. Model for the development of multiple outgrowths that extend in the same direction.**

1357 **(A)** The SDAL process is illustrated for sites along a surface of a neuron as in Figure 1. The positive and

1358 negative feedback loops of the SDAL process allow spatial patterns of outgrowth to develop

1359 autonomously. The number of sites where a strong directional bias is ultimately created is dictated by

1360 the relative effectiveness of the positive and negative feedback loops. **(B)** Schematic diagram of the

1361 outgrowth of a neuron through an environment of multiple extracellular cues as described in Figure 3A.

1362 The flow of membrane mass (box) at different sites depends on the probability distribution for the

1363 direction of outgrowth created at regions along the surface. Random walk modeling as described in

1364 Figure 2E is shown below the schematic diagram. At time X, two sites which have a greater directional

1365 bias (2 and 4) are established by the SDAL process as depicted in A. Cues may not be present in steep

1366 gradients along the axis perpendicular to the direction of extension. The response to these cues creates

1367 probabilities for outgrowth that are equal in the perpendicular directions. The greatest directional bias

1368 is created when there is an equilibrium for the probability of outgrowth in perpendicular directions.  
 1369 Because cue levels may vary gradually along the perpendicular axis, the strength of the directional bias  
 1370 at sites may differ, however the bias will be oriented in the same direction. At time  $x + 1$ , positions 2  
 1371 and 4 have proceeded further outward because of greater membrane displacement. This effect is  
 1372 magnified by increasing levels of the outgrowth promoting cue (blue). This activity together, when  
 1373 averaged over time across a surface, is predicted to cause the dynamic development of multiple  
 1374 extensions.

1375

1376

1377

1378

1379

**A. outgrowth patterning**  
 positive and negative feedback loops

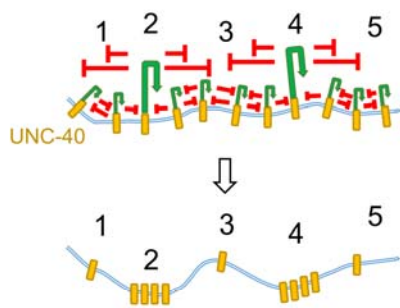

**B. mass displacement**

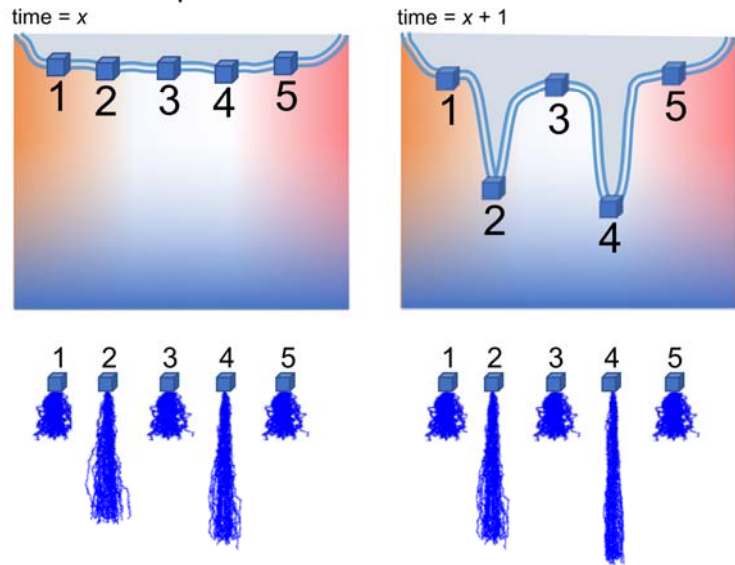

|                       |   |     |     |     |      |     |     |      |     |     |     |
|-----------------------|---|-----|-----|-----|------|-----|-----|------|-----|-----|-----|
| $P(\text{anterior})$  | = | 0.4 | 0.2 | 0.4 | 0.15 | 0.4 | 0.4 | 0.15 | 0.4 | 0.1 | 0.4 |
| $P(\text{posterior})$ | = | 0.4 | 0.2 | 0.4 | 0.15 | 0.4 | 0.4 | 0.15 | 0.4 | 0.1 | 0.4 |
| $P(\text{ventral})$   | = | 0.2 | 0.6 | 0.2 | 0.7  | 0.2 | 0.2 | 0.7  | 0.2 | 0.8 | 0.2 |

1380

1381



1382

1383

1384

1385

1386

1387

1388

1389

1390

1391

1392

1393

1394 **Figure 6. Model for the control of outgrowth activity by SDAL.** Schematic diagram of the control of  
1395 UNC-40- and nonUNC-40-mediated outgrowth activity. Neuronal surfaces of the neuron are subjected  
1396 to different levels of UNC-6 (blue) as well as nonUNC-6 extracellular cues (orange). The SDAL process  
1397 regulates both UNC-40 and nonUNC-40-mediated outgrowth activity. Positive feedback (arrows)  
1398 amplifies the polarized response to an extracellular cue, while negative feedback (lines) limits the  
1399 response and can confine the positive feedback to the site of ligand interaction. The long-range  
1400 negative feedback mediated by UNC-40 inhibits the UNC-40 response to UNC-6, as well as nonUNC-40  
1401 activity. Similarly, long-range negative feedback mediated by nonUNC-40 activity inhibits the UNC-40  
1402 response to UNC-6.

1403

1404

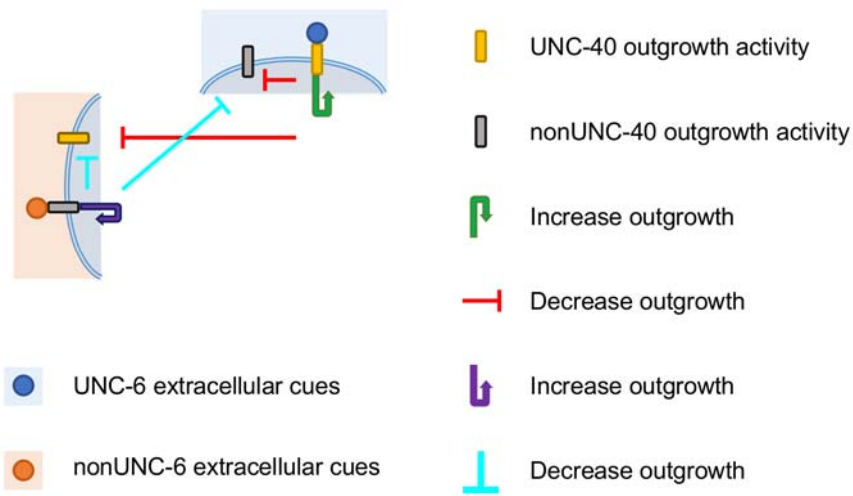

1405

1406

1407

1408

1409

1410

1411

1412

1413 **Figure 7. UNC-5 regulates the patterning of outgrowth extensions from HSN. (A)**

1414 Photomicrographs of HSN at the L1, L2, and adult stages in wildtype and *unc-5(e53)* mutants. In L1 and

1415 L2 animals neurite extensions (arrows) are often observed in wild-type animals but are more rare in

1416 *unc-5* mutants. The short ventral migration of the cell body that occurs in wild-type animal sometimes

1417 fails in *unc-5* mutants, leaving the cell body farther from the PLM axon (arrowhead) with a single longer

1418 ventral extension. The position of the cell body remains dorsal. Scale bar: 10  $\mu$ m. (B) The percentage of

1419 HSN neuron with 0, 1, or more than 1 neurite extension at the L1 stage. In *unc-5* mutants nearly half of

1420 the neurons do not extend a process. Error bars indicated the standard error mean; n values are

1421 indicated above each column. Significant differences (two-tailed t-test), \*P<0.001. (C) The percentage of  
1422 HSN neurons with a single long extension at the L2 stage. Several *unc-5* alleles were tested as described  
1423 in the text. In mutants with loss-of-function there is more often a single extension from the cell body  
1424 and the cell body is dorsally mispositioned. (D) Photomicrographs of HSN at the early L4, late L4, and  
1425 adult stages in wildtype and in animals expressing UNC-6ΔC. The expression of UNC-6ΔC induces  
1426 multiple processes, most often two major extensions, that are guided ventrally. (E) The percentage of  
1427 HSN neurons with a cell body mispositioned dorsally at the L2 stage. In loss-of-function mutants the cell  
1428 body often fails to undertake a short ventral migration during the L2 stage. The migration is not  
1429 delayed, but rather it remains dorsal. (F) The percentage of HSN neurons with multiple ventral  
1430 extensions at the L4 stage. The additional processes induced by UNC-6ΔC can be suppressed by *unc-5*  
1431 and *mig-10* mutations. Additional processes induced by *mig-15(rh148)* can also be suppressed by the  
1432 *unc-5* mutation. (G) Photomicrographs of HSN at adult stages in a *mig-15* mutant. Similar to UNC-6ΔC  
1433 expression, *mig-15* mutations can also cause additional processes that are guided ventrally (YANG *et al.*  
1434 2014).

1435

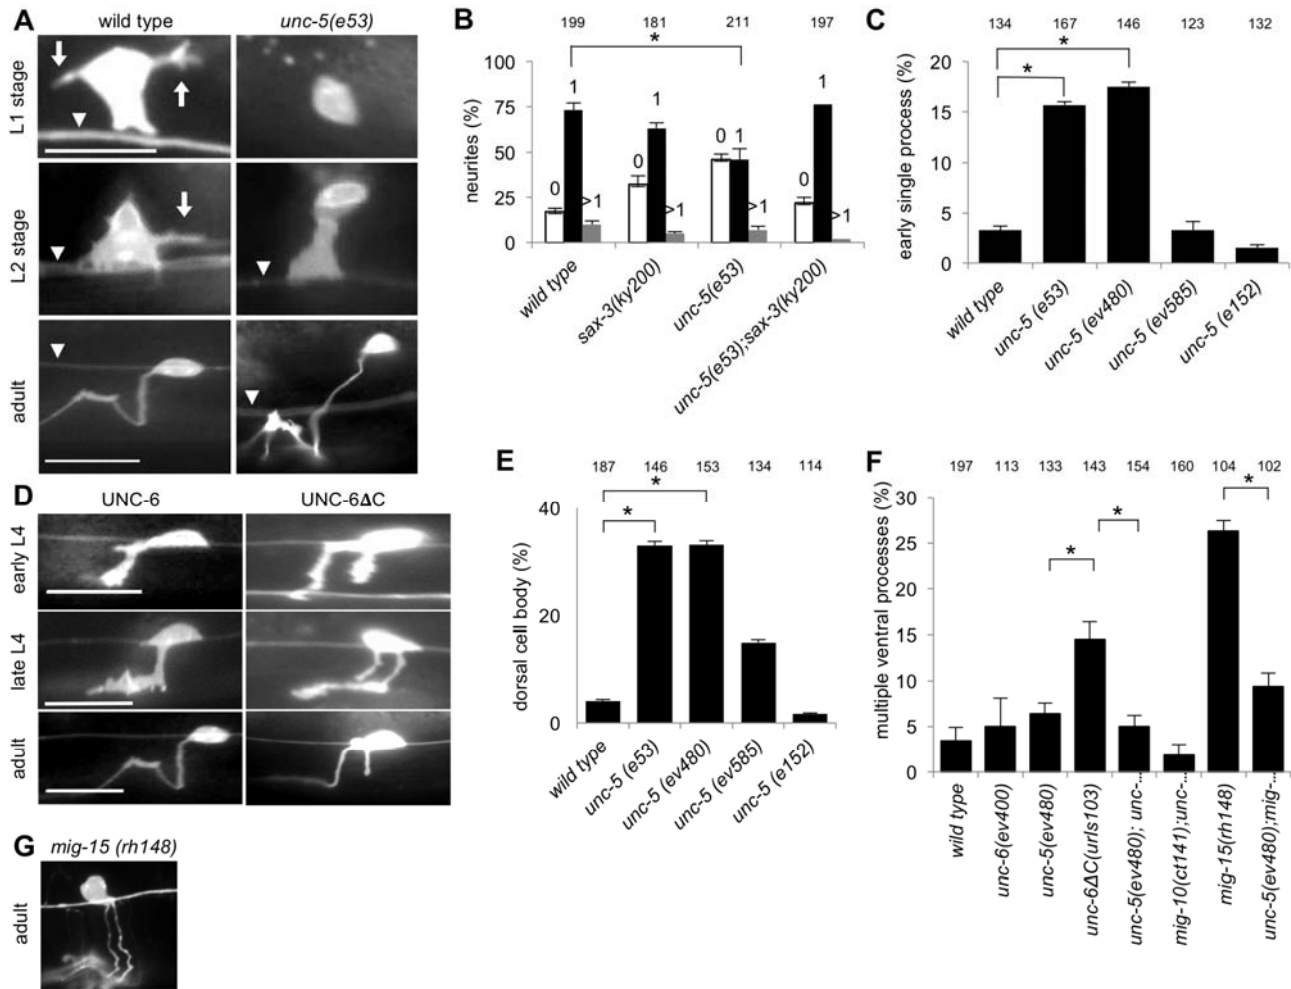

1436

1437

1438 **Figure 8. UNC-5 regulates the patterning of extension from ALM, AVM, and PLM. (A)**  
1439 Photomicrographs of the ALM, AVM, and PLM neurons at the L4 stage in wild-type animals and *mig-15*  
1440 mutants. In wildtype (top) a single PLM axon travels anteriorly from the posterior cell body (not  
1441 shown). Near the vulva (arrow) the axon branches; one branch extends to the ventral nerve chord and  
1442 another extends anteriorly. The anterior extension terminates before reaching the area of the ALM cell  
1443 body. In *mig-15* mutants the PLM can extend anteriorly past the ALM cell body (bottom). (B) The  
1444 percentage of PLM neurons where the PLM neuron extend anteriorly past the ALM cell body. The  
1445 anterior extension often over-extends in *mig-15* mutants. Loss of *unc-5* or *unc-40* function can suppress  
1446 this phenotype. (C) Photomicrographs of the ALM and AVM neurons at the L4 stage in wild-type animals  
1447 and mutants showing different patterns of outgrowth extension. In wildtype (top) a single axon travels  
1448 anteriorly to the nerve ring (arrowheads). At the nerve ring the axon branches; one branch extends  
1449 further anteriorly and the other extends into the nerve ring. In mutants, one or both axons may only  
1450 extend anteriorly and will not extend into the nerve ring (second from top). Or one or both axons will  
1451 only extend into the nerve ring and will not extend anteriorly (third from top). Or one or both axons  
1452 will fail to extend into either the nerve ring or anteriorly (bottom). Scale bar: 20  $\mu$ m. (D) The  
1453 percentage of AVM neurons where the AVM neuron failed to extend into the nerve ring. The neuron  
1454 often fails to extend in the *unc-40* and *mig-15;unc-5* mutants, whereas it does extend in the *mig-15, unc-*  
1455 *5*, and *mig-15;unc-40* mutants. Error bars indicated the standard error mean; n values are indicated  
1456 above each column. Significant differences (two-tailed t-test), \*P<0.001. (E) The percentage of AVM  
1457 neurons where the AVM neuron failed to extend anteriorly, past the nerve ring. The neuron often fails  
1458 to extend anteriorly in the *mig-15;unc-5* mutants, whereas it does extend in the *mig-15, unc-5, unc-40*,  
1459 and *unc-40;mig-15* mutants. There is a significant difference between the *unc-40* and *unc-40;mig-15*  
1460 mutants.

1461

1462

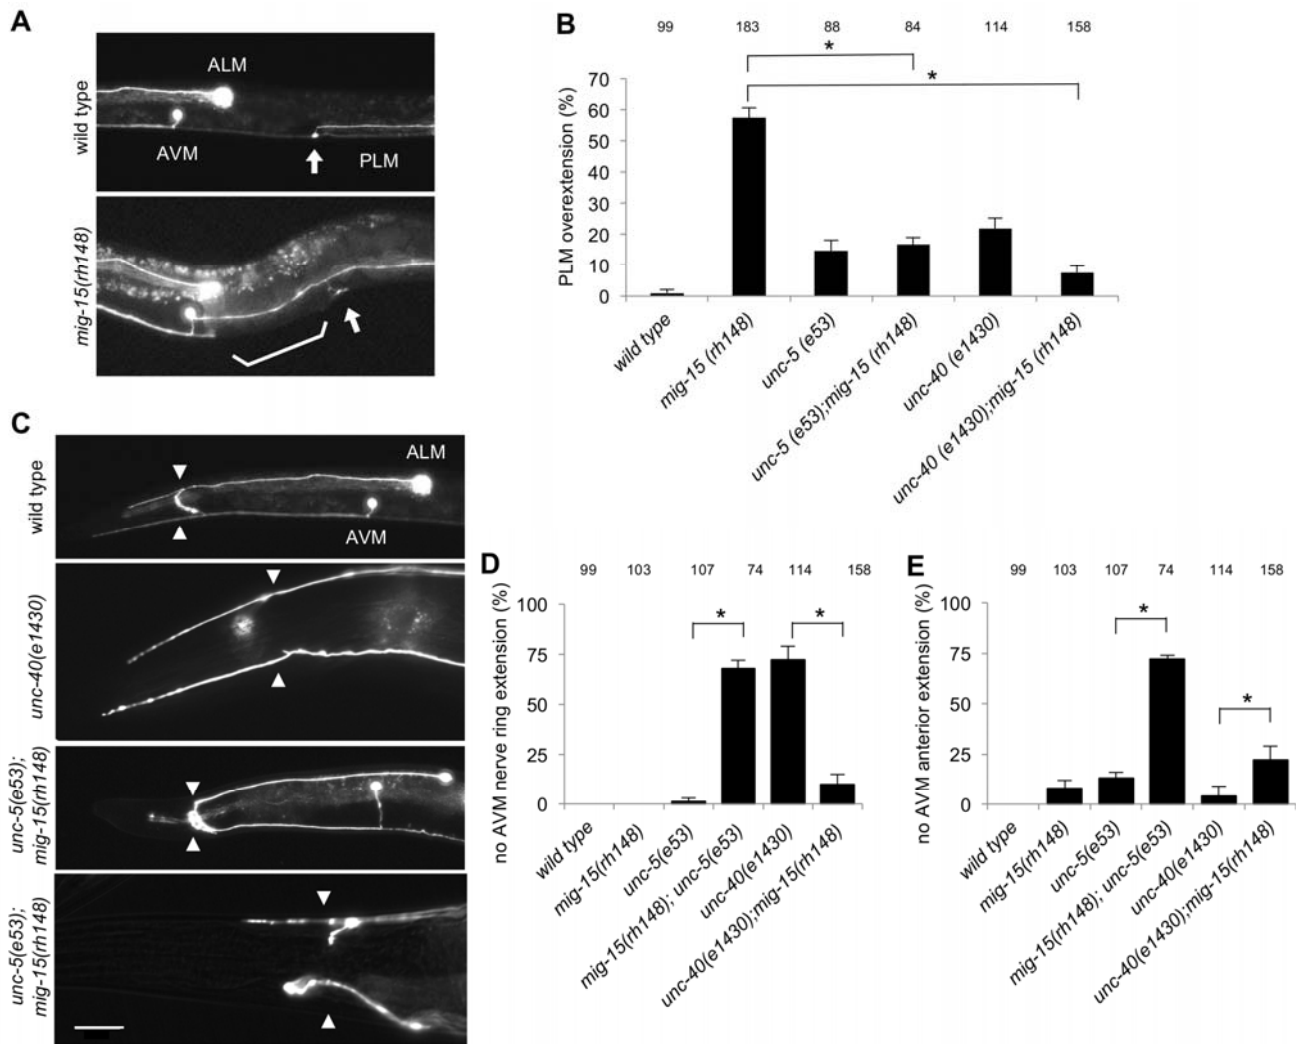

1463

1464

1465 **Figure 9. Assay to measure the effects a mutation has on movement.** (A) The direction of  
1466 outgrowth extension from the HSN cell body can vary and whether the axon developed in the  
1467 dorsal, anterior, posterior, or ventral direction in L4 stage animals is scored (left panel). This  
1468 creates a probability distribution in which the direction ( $X$ ) is a random variable (center panel).  
1469 A simple random walk is generated by using the same probability distribution for a succession  
1470 of steps with an equal time interval (right panel). (B) For wildtype and two mutants, 50  
1471 simulated random walks of 500 steps were plotted from an origin (0,0). The results graphically  
1472 indicate the directional bias for movement. For random walk movement created in mutant A  
1473 (red, results from *unc-5(e53)*), the directional bias is shifted anteriorly (left) relative to  
1474 wildtype. The results also graphically show the displacement of movement. For random walk  
1475 movement created in mutant B (blue, results from *egl-20(n585);sax-3(ky123)*), the average of  
1476 the final position (displacement) from the origin is a much shorter distance than wildtype. (C)  
1477 Plots of the normal distribution of the final position along the x axis of the random walk tracks  
1478 shown in B. The mean position for each is set at 0. The plots graphically illustrate how random  
1479 walks constructed from the probability distribution for the direction of outgrowth extensions  
1480 can reveal a diffusion process.

1481

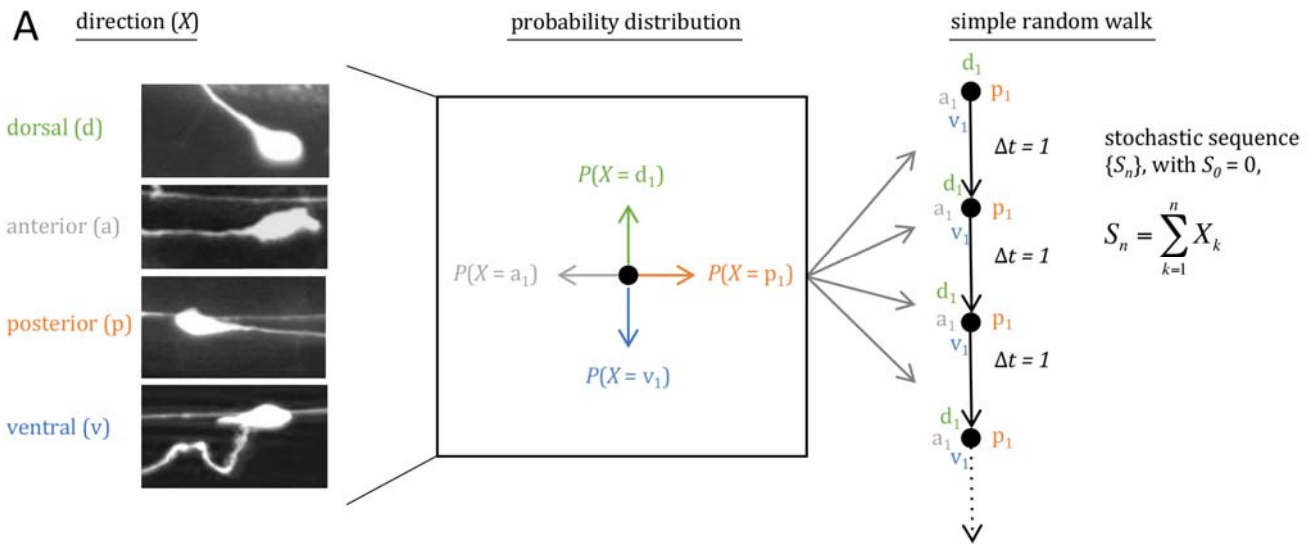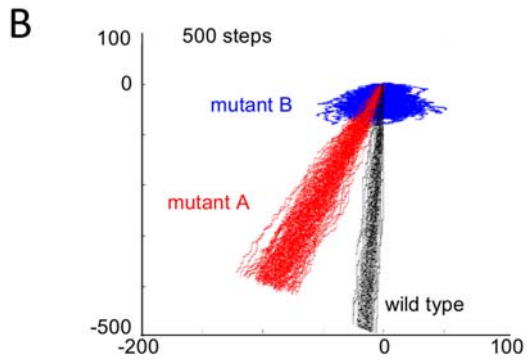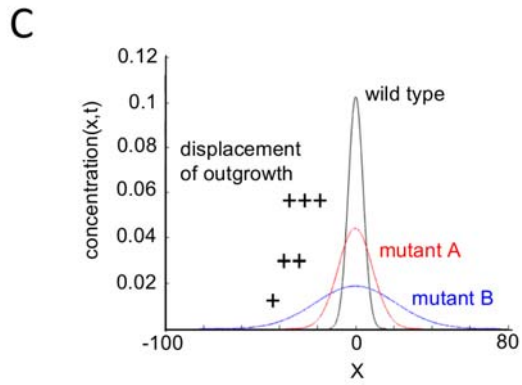

1482

1483



1484 **Figure 10. Mutations have different effects on movement.** Examples of random walk  
1485 analyses using the direction of axon development from the HSN neuron in different mutants  
1486 (Table 1). The graphs were created as described in the figure legend of Figure 9. For each  
1487 panel, plots are shown for the normal distribution of the final position along the x axis for the  
1488 random walk tracks plotted in the inserts. The inserts depict the random walk movement that  
1489 would be produced by the probability distribution for the direction of outgrowth in the mutant.  
1490 Plots derived from the same data are colored alike. Each panel depicts the analyses of four  
1491 different mutants and wildtype. Three different distribution patterns are observed: (1) the  
1492 wild-type distribution, which has the distribution curve with the highest peak; (2) the *unc-5*,  
1493 *egl-20*, *unc-53*, and *unc-6* (not shown) distribution, which is flatter than the wild-type curve; (3)  
1494 the *madd-2*, *sax-3*, *mig-15*, and double combinations, which have the flattest distribution curve.  
1495

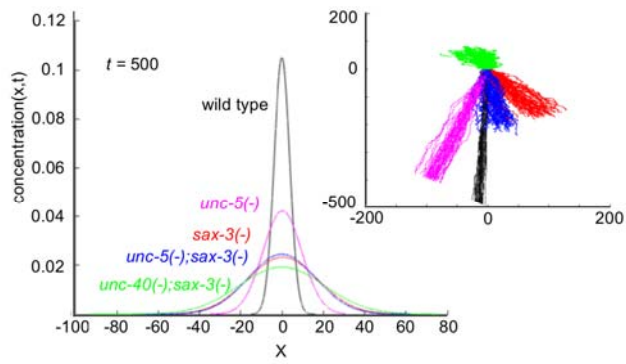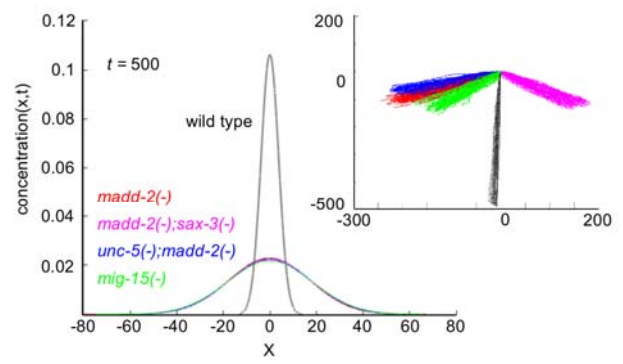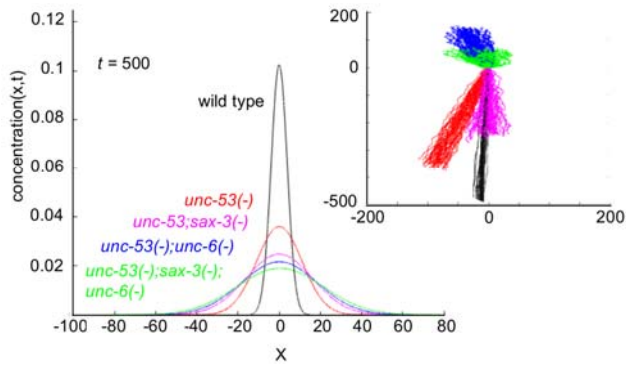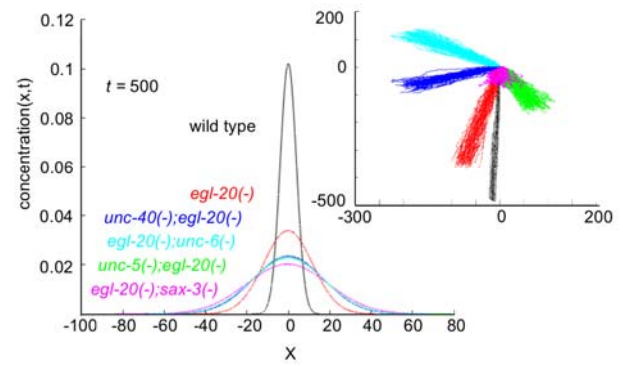

1496

1497

1498 **Figure 11. Mutations alter the spatial extent of movement.** (A) Plotted are the mean squared  
1499 displacement (MSD) curves as a function of time interval ( $dt$ ). The values are in arbitrary units, since  
1500 the time scale was arbitrarily set at 1. The curves show the extent that different mutations can alter the  
1501 MSD relative to wildtype and the MSD caused by an unbiased random walk. For each time interval, mean  
1502 and s.e.m. are plotted. (B) From the slope of MSD curves a coefficient can be derived that gives the  
1503 relative rate of diffusion. Colored bars correspond to the like-colored curves given in panel A. The  
1504 coefficients for *unc-5*, *egl-20*, *unc-53*, and *unc-6* form a class that is distinct from that derived from  
1505 wildtype and from the double mutants.  
1506

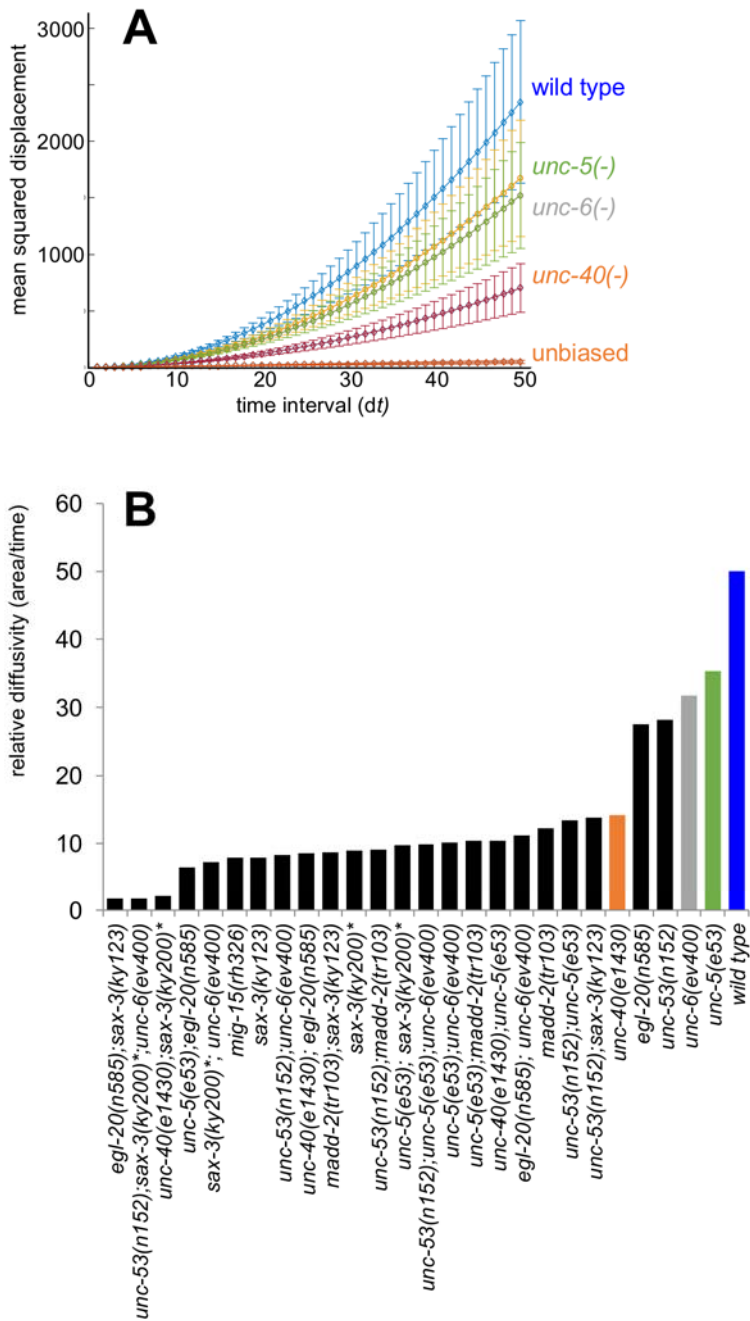

1507

1508

1509 **Figure 12. Models for the relationship between UNC-40-mediated outgrowth activity and UNC-40**  
1510 **receptor clustering. (A)** The SDAL process is illustrated as in Figure 1. In this model, the self-  
1511 organizing UNC-40 SDAL process causes observable UNC-40 receptor clustering. UNC-6 stabilizes  
1512 receptor clustering at a site and the outgrowth machinery is then recruited to cause outgrowth at the  
1513 site. Although the initial direction of asymmetric receptor localization is determined stochastically, the  
1514 direction of outgrowth is determined by the site of stabilization. **(B)** In this model, the self-organizing  
1515 UNC-40 SDAL process is coupled to the outgrowth machinery. The direction of both asymmetric  
1516 receptor localization and outgrowth activity are stochastically determined. Observable receptor  
1517 clustering arises as the result of the process because receptor localization can become successively  
1518 concentrated to a smaller area over time. Cluster formation is an observable phenomenon of the  
1519 process, not a prerequisite for outgrowth activity. This model postulates innumerable fluctuating sites  
1520 that generate force in various directions along the membrane.

1521

1522

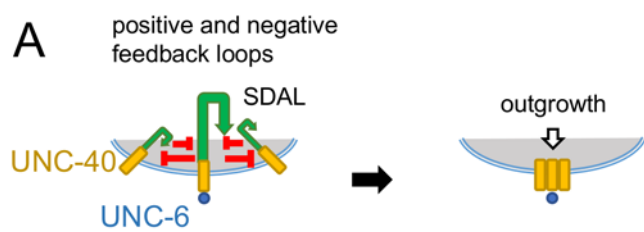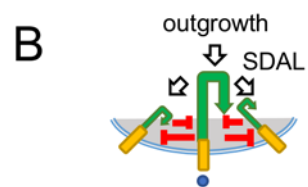

1523

1524

1525 **Figure 13. Mutations affect asymmetric intracellular UNC-40::GFP localization.** (A) Graph  
1526 indicating the dorsal-ventral localization of UNC-40::GFP in HSN. The graph shows the average ratio of  
1527 dorsal-to-ventral intensity from linescan intensity plots of the UNC-40::GFP signal around the periphery  
1528 of the HSN cell. UNC-40::GFP is ventrally localized in wildtype, but the ratio is different in the mutants.  
1529 Error bars represent standard error of mean. Below is a graphic representation of the possible UNC-40  
1530 localization patterns when the intensity ratio is  $\geq 1$  or is  $< 1$ . (B) Graph indicating the anterior-posterior  
1531 localization of UNC-40::GFP. To determine orientation, line-scan intensity plots of the UNC-40::GFP  
1532 signal across the dorsal periphery of the HSN cell were taken, the dorsal surface was geometrically  
1533 divided into three equal segments, and the total intensity of each was recorded. The percent intensity  
1534 was calculated for each segment and ANOVA was used to determine if there is a significant difference  
1535 between the three segments (see Material and Methods). The graph shows the percent of animals that  
1536 had significant localization in the indicated segments or that had uniform distribution. Whereas in the  
1537 *unc-5* and *egl-20* mutants there is a bias for anterior or posterior localization, there is a uniform  
1538 distribution in *unc-5;egl-20* double mutants. Uniform distribution is also observed in strong loss-of-  
1539 function *sax-3* and *madd-2* mutants. (\*) Animals grown at the *sax-3(ky200)* restrictive temperature  
1540 (25°C). Below each graph is a representation of the possible UNC-40 localization patterns. The  
1541 orientation of UNC-40 localization is color-coded as in B.  
1542

A. Dorsal-ventral orientation of UNC-40 asymmetric localization

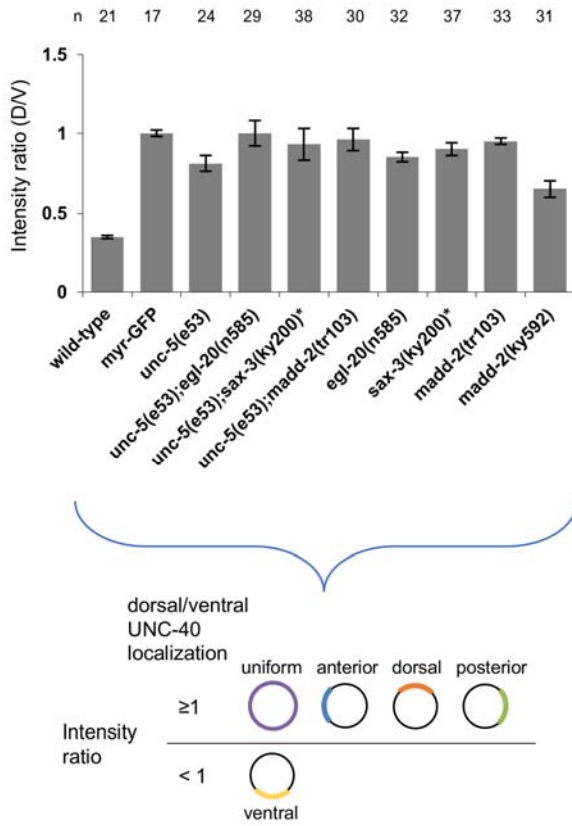

B. Anterior-posterior orientation of UNC-40 asymmetric localization

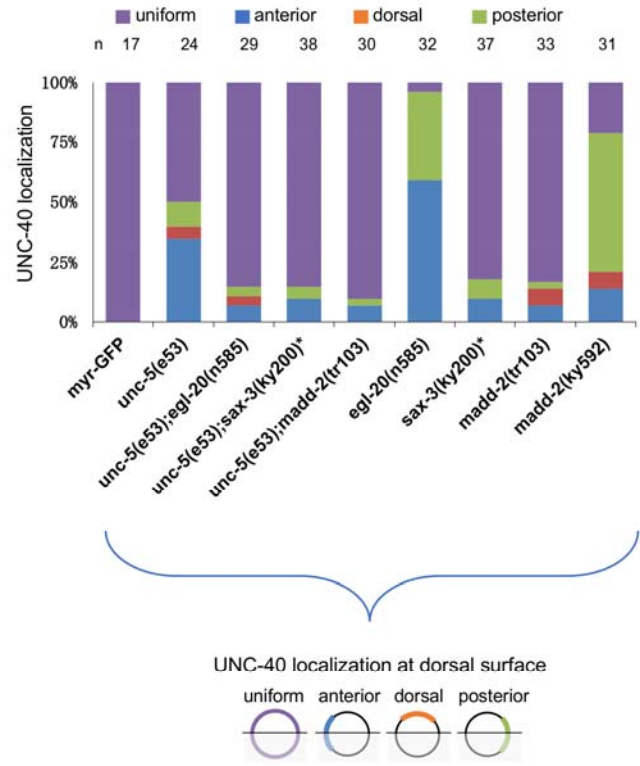

1543

1544



1545 **Figure 14. Model for the outgrowth movement of PLM.** Schematic diagrams of the anteriorly  
1546 directed outgrowth of PLM. The features of the schematic are presented in Figure 3. **(A)** An extension  
1547 encounters different levels of extracellular cues at each of three positions (1-3). Cues dorsal and ventral  
1548 of the pathway maintain an equal probability of outgrowth in both directions. The extension encounters  
1549 increasing levels of an extracellular cue(s) as it moves towards position 3. At position 3, a cue(s)  
1550 prevent further anterior extension in wildtype. **(B)** Table showing for each of the positions depicted in  
1551 A the positive feedback (arrows) and negative feedback (lines) associated with SDAL activity (see Figure  
1552 6) and the predicted effect the SDAL activity has on outgrowth activity. At position 1, strong UNC-40  
1553 activity along the dorsal and ventral (not shown) facing surfaces of the leading edge inhibit nonUNC-40  
1554 activity. Because of the SDAL process, this inhibition increased nonUNC-40 activity at the anterior  
1555 surface of the leading edge. At positions 2 and 3, increasing levels of the nonUNC-40 activity at the  
1556 dorsal and ventral surfaces inhibit UNC-40 activity. The increase in nonUNC-40 activity at the dorsal  
1557 and ventral surfaces cause a decrease in nonUNC-40 activity at the anterior surface. As a result, the  
1558 degree to which the direction of nonUNC-40-mediated outgrowth activity fluctuates is greatest at  
1559 position 3. **(C)** For each position in A, random walk modeling is shown as described in Figure 2E. The  
1560 response to the extracellular cues progressively increases the degree to which the direction of  
1561 outgrowth activity fluctuates. By position 3, the degree of fluctuation causes a much lower displacement  
1562 of membrane mass. The low rate of outward movement causes extension to stall.

1563

A. position

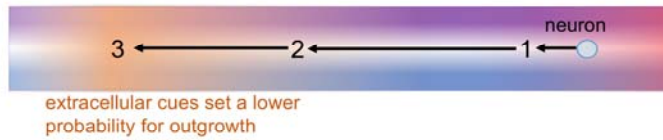

B. leading edge activity

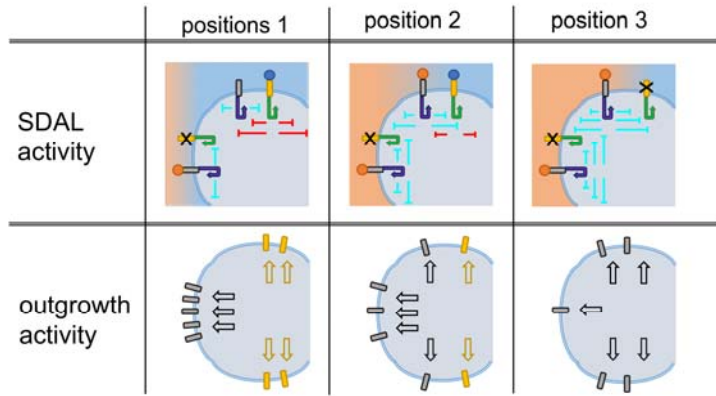

C. mass displacement

| position |  | $P(\text{anterior})$ | $P(\text{dorsal})$ | $P(\text{ventral})$ |
|----------|--|----------------------|--------------------|---------------------|
| 1        |  | 0.6                  | 0.2                | 0.2                 |
| 2        |  | 0.4                  | 0.3                | 0.3                 |
| 3        |  | 0.2                  | 0.4                | 0.4                 |

1564

1565

1566 **Figure 15. Model for the effects that mutations have on the outgrowth movement of PLM.** Table  
1567 showing the effects of different mutations on the outgrowth of PLM at position 3, Figure 14. PLM  
1568 outgrowth stalls in wildtype, *unc-40*, and *unc-5;mig-15* mutants at position 3, but overextends in *mig-15*  
1569 mutants. In this model, the *mig-15* mutation represses the ability of nonUNC-40 SDAL activity to  
1570 suppress UNC-40 activity at the dorsal and ventral surfaces. Increased UNC-40 SDAL activity  
1571 suppresses nonUNC-40 SDAL activity at these surfaces. Because of the statistical dependence of the  
1572 localization process, decreasing nonUNC-40 SDAL activity at the dorsal and ventral surfaces increases  
1573 nonUNC-40 SDAL activity at the anterior surface. As compared to wildtype, the degree to which the  
1574 direction of nonUNC-40 outgrowth activity fluctuates is less and, therefore, outward displacement is  
1575 greater. This allow further anterior outgrowth at position 3. Loss of UNC-5 function in the *mig-15*  
1576 mutant decreases the ability of UNC-40 SDAL activity to suppresses nonUNC-40 SDAL activity at the  
1577 dorsal and ventral surfaces, thereby increasing the degree to which the direction of nonUNC-40  
1578 outgrowth activity fluctuates. This reduces outward displacement and suppresses the overextension  
1579 phenotype.

1580

figure 14, position 3

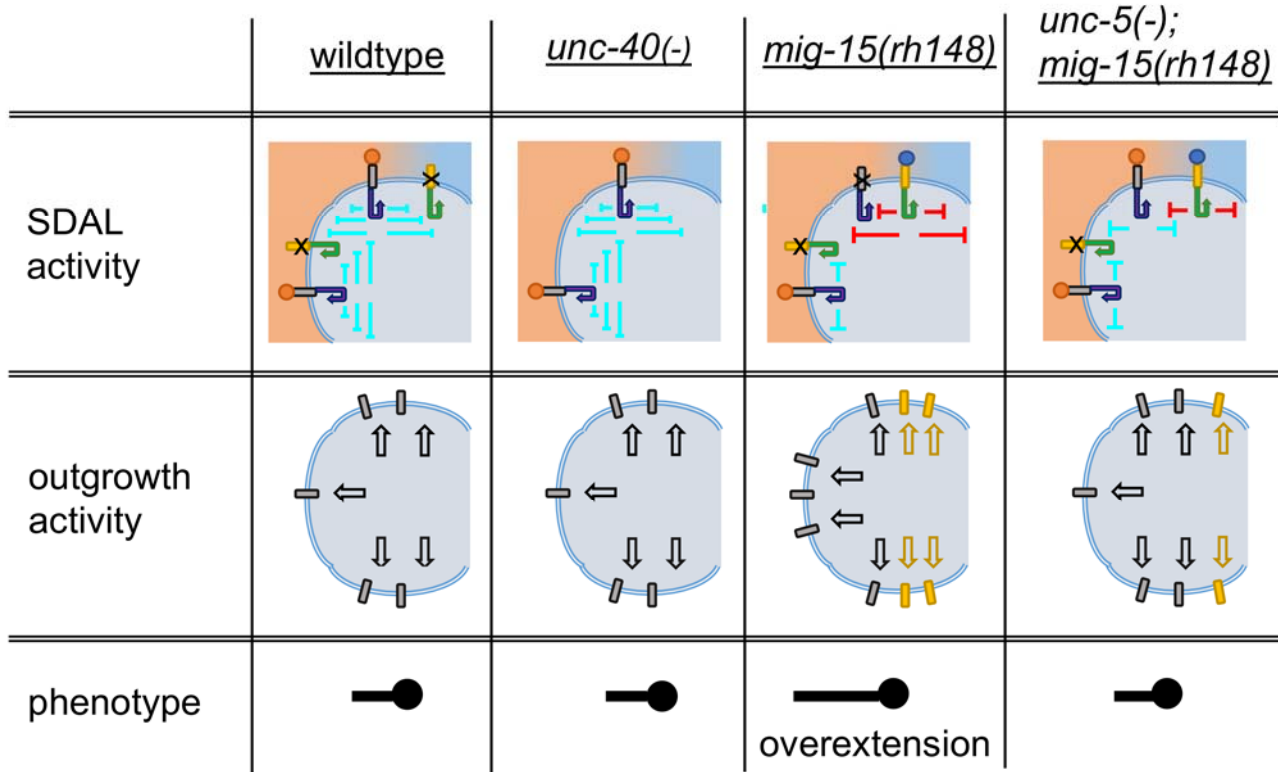

1581

1582 **Figure 16. Model for the outgrowth movement of AVM at the nerve ring.** Schematic diagrams of the  
1583 outgrowth of AVM at the nerve ring. The features of the schematic are described in Figure 3. **(A)** At  
1584 position 1, all surfaces experience high levels of UNC-6. At position 2, the extension encounters new  
1585 cue(s) at the anterior surface. **(B)** Table showing for each of the positions depicted in A the positive  
1586 feedback (arrows) and negative feedback (lines) associated with SDAL activity (see Figure 6) and the  
1587 predicted effect that the SDAL process has on outgrowth activity. At position 1, strong UNC-40 SDAL  
1588 activity along anterior and dorsal facing surfaces of the leading edge inhibit nonUNC-40 SDAL activity.  
1589 There is strong UNC-40 mediated outgrowth from all surfaces. At position 2, nonUNC-40 SDAL activity  
1590 at the anterior surface inhibits UNC-40 SDAL activity, whereas UNC-40 SDAL activity at the dorsal  
1591 surface inhibits nonUNC-40 SDAL activity. As a result, UNC-40 outgrowth activity is limited to the  
1592 dorsal surface and nonUNC-40 outgrowth activity is limited to the anterior surface. **(C)** Random walk  
1593 modeling is shown as described in Figure 2E. Because of the large degree to which the direction of  
1594 outgrowth fluctuates, outward movement stalls. This allows cues that are arranged dorsal and anterior  
1595 to the projection to effectively create a bias for outgrowth in the respective direction (see Figure 4). A  
1596 dorsal directional bias will develop because UNC-40 and other receptors mediates an outgrowth  
1597 response to UNC-6 and other cues along the nerve ring. An anterior directional bias will develop  
1598 because nonUNC-40 mediates an outgrowth response to cues along an anterior pathway.

1599

1600

### A. position

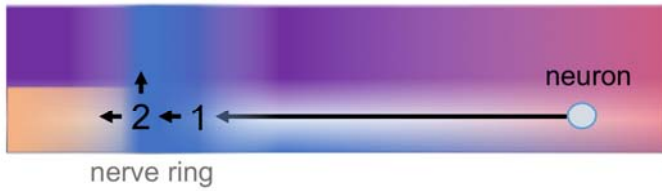

### B. leading edge activity

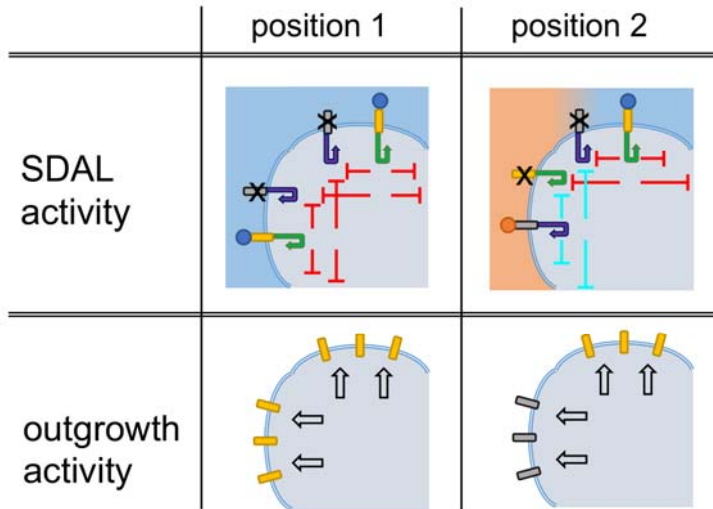

### C. mass displacement

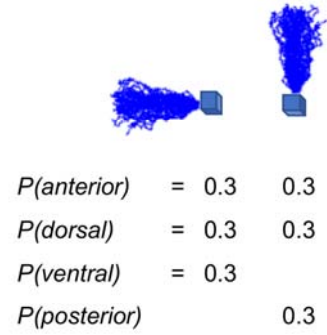

1601

1602

1603

1604 **Figure 17. Model for the effects that mutations have on the outgrowth movement of AVM at the**  
1605 **nerve ring.** Table showing the effects of different mutations on the outgrowth of AVM at position 2,  
1606 Figure 16. Whereas in wildtype, UNC-40 SDAL activity suppresses nonUNC-40 SDAL activity at the  
1607 dorsal surface, in *unc-40* mutants there is no suppression and nonUNC-40 activity may occur. However,  
1608 nonUNC-40 activity is greater at the anterior surface because of the response to anterior cues and this  
1609 depresses nonUNC-40 activity at the dorsal surface because of the SDAL process. As a result, there is  
1610 often anterior extension from the nerve ring area but no dorsal extension into the nerve ring. In *unc-5*  
1611 mutants, UNC-40 SDAL activity is reduced but it is still dorsally oriented. This allows dorsal extension in  
1612 the mutants. In *mig-15* mutants, nonUNC-40 SDAL activity is repressed. This results in lower nonUNC-  
1613 40 activity at the anterior surface. However, anterior extension still occur, as does dorsal extension  
1614 because of UNC-40 activity. Loss of UNC-40 in the *mig-10* background allows extension in both  
1615 directions. In comparison to the single *unc-40* mutant, the reduced nonUNC-40 SDAL activity at anterior  
1616 surface in the double *unc-40;mig-15* mutant doesn't depress dorsal nonUNC-40 outgrowth activity as  
1617 much, allowing more extension into the nerve ring. Loss of UNC-5 in the *mig-10* background causes the  
1618 most abnormal outgrowth morphologies, presumably because the repression of both UNC-40 and  
1619 nonUNC-40 SDAL activities does not allow UNC-40 and nonUNC-40 outgrowth activities to be well  
1620 sorted to different surfaces.

1621

1622

1623

figure 16, position 2

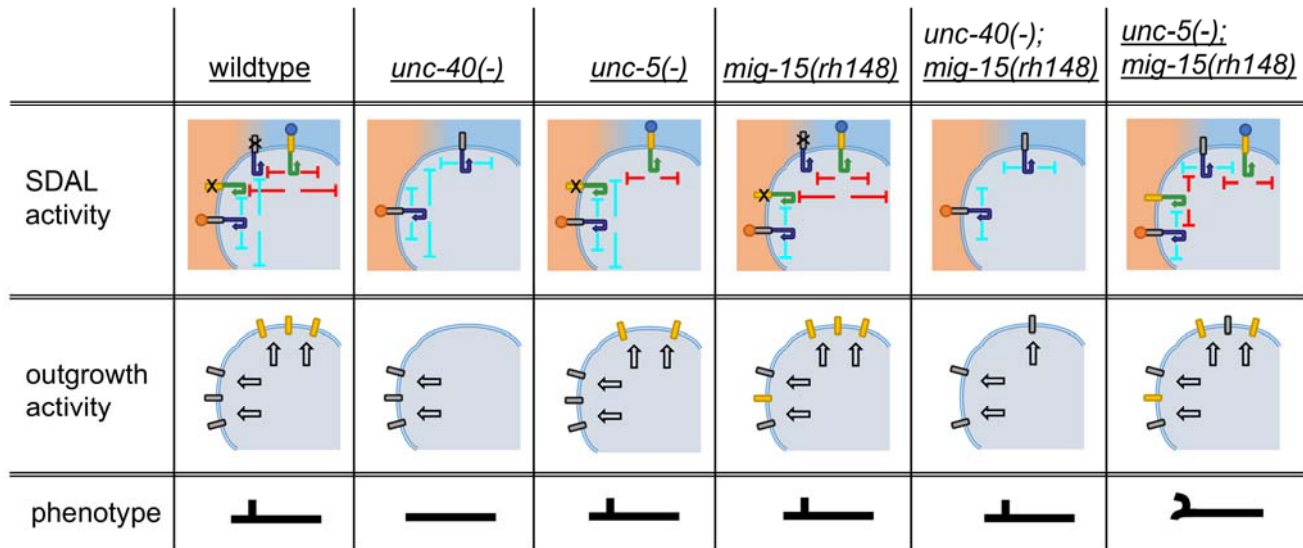

1624

1625

1626

1627



1628 **Figure 18. Model for the outgrowth movement of HSN.** Schematic diagrams of the ventral outgrowth  
1629 of HSN. The features of the schematic are described in Figure 3. **(A)** As the leading edge of the extension  
1630 moves ventrally it encounters higher levels of UNC-6. At position 3, all surfaces experience high levels of  
1631 UNC-6. Cues anterior and posterior of the pathway maintain an equal probability of outgrowth in both  
1632 directions. **(B)** Table showing for each of the positions depicted in A the positive feedback (arrows)  
1633 and negative feedback (lines) associated with SDAL activity (see Figure 6) and the predicted effect that  
1634 the SDAL process has on outgrowth activity. At position 1, strong UNC-40 SDAL activity along the  
1635 ventral facing surfaces of the leading edge inhibit nonUNC-40 SDAL activity. Because of the SDAL  
1636 process, this inhibition increased nonUNC-40 activity at the anterior and posterior (not shown) surfaces  
1637 of the leading edge. NonUNC-40 SDAL activity along the anterior and posterior surfaces suppress UNC-  
1638 40 SDAL activity at these surfaces. At positions 2 and 3, increasing levels of the UNC-40 SDAL activity at  
1639 the anterior and posterior surfaces inhibit nonUNC-40 SDAL activity. The increase in UNC-40 activity at  
1640 the anterior and posterior surfaces cause a decrease in nonUNC-40 SDAL activity. As a result, the degree  
1641 to which the direction of UNC-40-mediated outgrowth activity fluctuates is greatest at position 3. **(C)**  
1642 For each position in A, random walk modeling is shown as described in Figure 2E. At first, the response  
1643 to the extracellular cues may progressively decreases the degree to which the direction of UNC-40 and  
1644 nonUNC-40 outgrowth activity fluctuates. However, as UNC-40 SDAL activity predominates at all  
1645 surfaces, the degree by which the direction of UNC-40 outgrowth fluctuates increases. By position 3, the  
1646 degree of fluctuation causes a much lower displacement of membrane mass.

1647

1648

1649

1650

## A. position

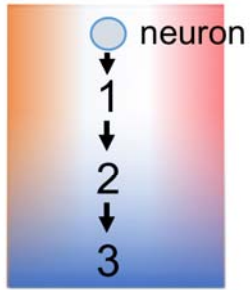

## C. mass displacement

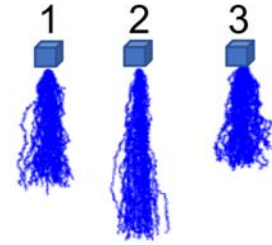

|                       |   |     |     |      |
|-----------------------|---|-----|-----|------|
| $P(\text{anterior})$  | = | 0.3 | 0.2 | 0.33 |
| $P(\text{posterior})$ | = | 0.3 | 0.2 | 0.33 |
| $P(\text{ventral})$   | = | 0.4 | 0.6 | 0.33 |

## B. leading edge activity

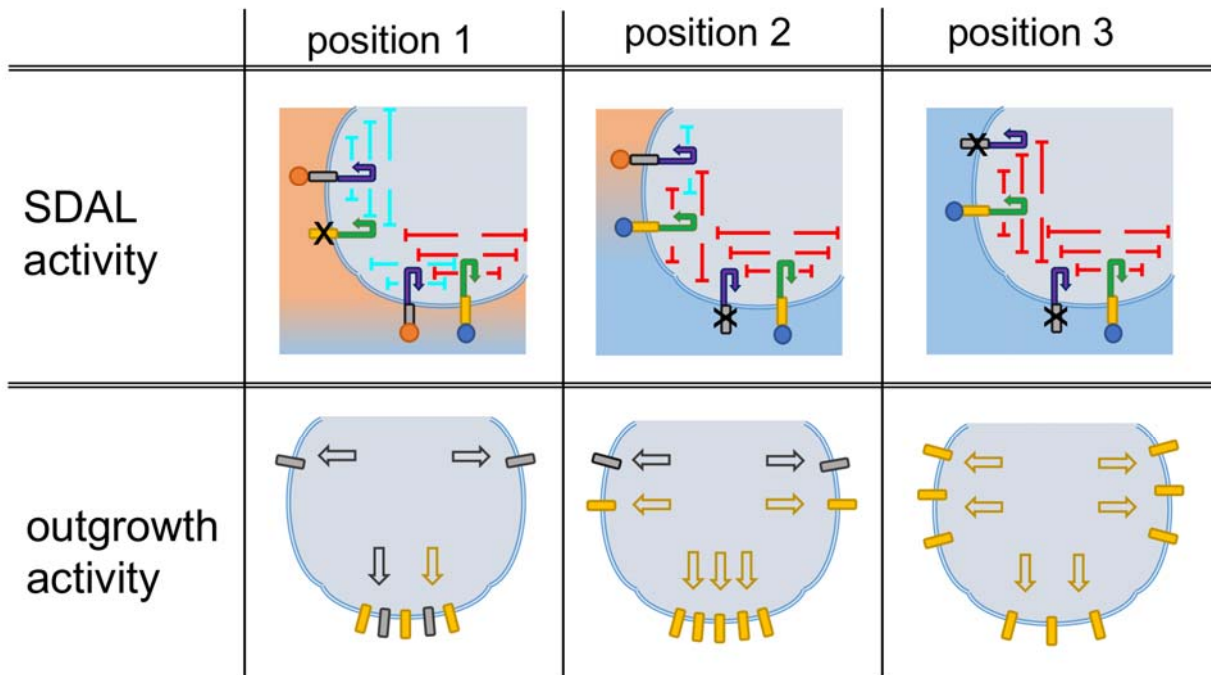

1651

1652

1653

1654 **Figure 19. Model for the effects that mutations have on the outgrowth movement of HSN.** Table  
1655 showing the effects of different mutations on the outgrowth of HSN at position 1, Figure 18. Mutations  
1656 can alter the rate of outgrowth and the number of extensions. In this model, the relative levels of UNC-  
1657 40 and nonUNC-40 SDAL activity controls this patterning. In wildtype, the ability of UNC-40 SDAL  
1658 activity to predominate at one site along the membrane is enhanced by nonUNC-40 SDAL activity, which  
1659 may increase the threshold at which UNC-40 positive feedback becomes effective. Overtime, the area  
1660 where UNC-40 SDAL predominates causes greater UNC-40 outgrowth activity. As outward movement  
1661 occurs, higher levels of UNC-6 are encountered. This enhances and localizes the process to that area. In  
1662 *mig-15* mutants the suppression of nonUNC-40 SDAL activity reduces the threshold at which UNC-40  
1663 SDAL activity may predominate at a site. This allows multiple sites along the membrane where UNC-40  
1664 SDAL activity may predominate. Multiple extensions may develop as shown in Figure 5. Loss of UNC-5,  
1665 which suppresses UNC-40 SDAL activity, retards the ability to enhance and localize the process. This  
1666 causes greater fluctuation in the direction of outgrowth activity across the entire ventral surface of the  
1667 neuron, which uniformly decreases the displacement of membrane.

1668

1669

1670

1671

1672

figure 18, position 1

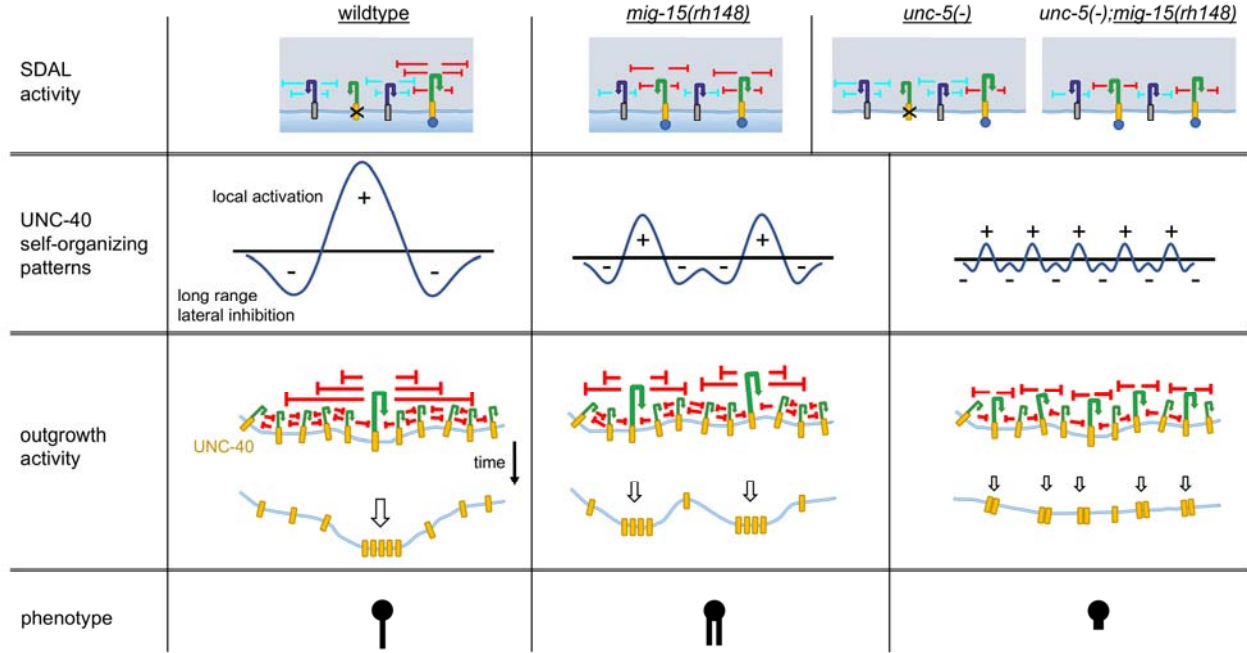

1673

1674

1675

1676 **Figure 20. Genetic pathways for self-organizing UNC-40 asymmetric localization.** (A) Table  
1677 summarizing the results of experiments previously reported and described in Figure 13 of this paper.  
1678 (B) The genetic data support a model whereby the UNC-6 and EGL-20 extracellular cues regulate at least  
1679 three pathways leading to robust asymmetric UNC-40 localization. Robust asymmetric UNC-40  
1680 localization refers to the ability to observe UNC-40::GFP clustering at the surface of the neuron. Arrows  
1681 represent activation; bars represent repression. See text for the logic used to construct the pathways.  
1682

| loss-of-function          | robust asymmetric UNC-40 localization | reference                  |
|---------------------------|---------------------------------------|----------------------------|
| <i>unc-6</i>              | no                                    | (Kulkarni et al., 2013)    |
| <i>unc-5</i>              | yes                                   | (Kulkarni et al., 2013)    |
| <i>unc-5 unc-6</i>        | no                                    | (Kulkarni et al., 2013)    |
| <i>unc-5 egl-20</i>       | no                                    | This study                 |
| <i>unc-5 sax-3</i>        | no                                    | This study                 |
| <i>unc-5 unc-53</i>       | no                                    | (Kulkarni et al., 2013)    |
| <i>unc-5 unc-53 unc-6</i> | yes                                   | (Kulkarni et al., 2013)    |
| <i>unc-5 unc-53 sax-3</i> | no                                    | This study                 |
| <i>unc-5 madd-2</i>       | no                                    | This study                 |
| <i>unc-6 unc-53</i>       | yes                                   | (Kulkarni et al., 2013)    |
| <i>unc-6 sax-3</i>        | no                                    | (Tang and Wadsworth, 2014) |
| <i>unc-6 unc-53 sax-3</i> | no                                    | (Tang and Wadsworth, 2014) |
| <i>egl-20</i>             | yes                                   | (Kulkarni et al., 2013)    |
| <i>egl-20 unc-53</i>      | yes                                   | (Kulkarni et al., 2013)    |
| <i>egl-20 unc-6</i>       | no                                    | (Kulkarni et al., 2013)    |
| <i>egl-20 sax-3</i>       | no                                    | (Tang and Wadsworth, 2014) |
| <i>sax-3</i>              | no                                    | (Tang and Wadsworth, 2014) |
| <i>sax-3 unc-53</i>       | no                                    | (Tang and Wadsworth, 2014) |
| <i>unc-53</i>             | yes                                   | (Kulkarni et al., 2013)    |
| <i>madd-2</i>             | no                                    | This study                 |
| <i>mig-15</i>             | yes                                   | (Yang et al., 2014)        |

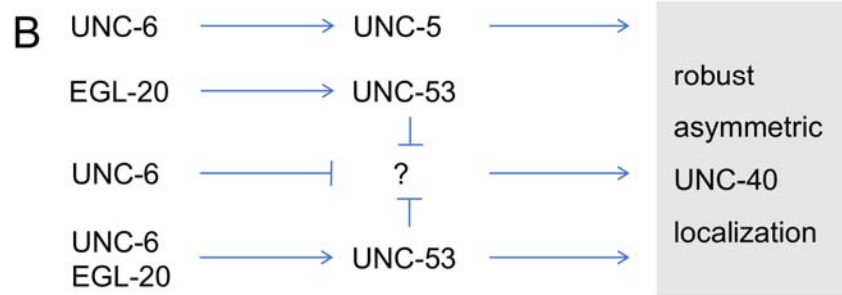

1683
